# Supplementary material for: Qualitative perspectives on the sustainability of sexual health continuous quality improvement in clinics serving remote Aboriginal communities in Australia
Source: PubMed Central journal article supplement — BMJ Open. 2019 May 5;9(5):e026679. doi: 10.1136/bmjopen-2018-026679 (PMC6502047; doi:10.1136/bmjopen-2018-026679), 2019-05-05
Supplement: bmjopen-2018-026679.draft_revisions.pdf [file bmjopen-2018-026679.draft_revisions.pdf]

# BMJ Open

BMJ Open is committed to open peer review. As part of this commitment we make the peer review history of every article we publish publicly available.

When an article is published we post the peer reviewers' comments and the authors' responses online. We also post the versions of the paper that were used during peer review. These are the versions that the peer review comments apply to.

The versions of the paper that follow are the versions that were submitted during the peer review process. They are not the versions of record or the final published versions. They should not be cited or distributed as the published version of this manuscript.

BMJ Open is an open access journal and the full, final, typeset and author-corrected version of record of the manuscript is available on our site with no access controls, subscription charges or pay-per-view fees (<http://bmjopen.bmj.com>).

If you have any questions on BMJ Open's open peer review process please email [info.bmjopen@bmj.com](mailto:info.bmjopen@bmj.com)

# BMJ Open

## Qualitative perspectives on the sustainability of sexual health continuous quality improvement in clinics serving remote Aboriginal communities in Australia

|                               |                                                                                                                                                                                                                                                                                                                                                                                                                                                                                                                                                                                                                                                                                                                                                                                                                                                                                                                           |
|-------------------------------|---------------------------------------------------------------------------------------------------------------------------------------------------------------------------------------------------------------------------------------------------------------------------------------------------------------------------------------------------------------------------------------------------------------------------------------------------------------------------------------------------------------------------------------------------------------------------------------------------------------------------------------------------------------------------------------------------------------------------------------------------------------------------------------------------------------------------------------------------------------------------------------------------------------------------|
| Journal:                      | <i>BMJ Open</i>                                                                                                                                                                                                                                                                                                                                                                                                                                                                                                                                                                                                                                                                                                                                                                                                                                                                                                           |
| Manuscript ID                 | bmjopen-2018-026679                                                                                                                                                                                                                                                                                                                                                                                                                                                                                                                                                                                                                                                                                                                                                                                                                                                                                                       |
| Article Type:                 | Research                                                                                                                                                                                                                                                                                                                                                                                                                                                                                                                                                                                                                                                                                                                                                                                                                                                                                                                  |
| Date Submitted by the Author: | 14-Sep-2018                                                                                                                                                                                                                                                                                                                                                                                                                                                                                                                                                                                                                                                                                                                                                                                                                                                                                                               |
| Complete List of Authors:     | Gunaratnam, Praveena; UNSW Sydney , Kirby Institute<br>Schierhout, Gill H.; UNSW Sydney, Kirby Institute<br>Brands, Jenny; Menzies School of Health Research<br>Maher, Lisa; UNSW Sydney, The Kirby Institute; Burnet Institute<br>Bailie, Ross; The University of Sydney, University Centre for Rural Health<br>Ward, James; South Australia Health and Medical Research Centre<br>Guy, Rebecca; UNSW Sydney, The Kirby Institute<br>Rumbold, Alice; University of Adelaide, Robinson Research Institute<br>Ryder, Nathan; University of Newcastle, School of Medicine and Public Health<br>Fairley, Christopher; Melbourne Sexual Health Centre; Monash University, Central Clinical School<br>Donovan, Basil; UNSW Sydney, The Kirby Institute<br>Moore, Liz; Aboriginal Medical Services Alliance Northern Territory<br>Kaldor, John; UNSW Sydney, The Kirby Institute<br>Bell, Stephen; UNSW Sydney, Kirby Institute |
| Keywords:                     | sexual health, Aboriginal, Australia, continuous quality improvement, primary health care, remote                                                                                                                                                                                                                                                                                                                                                                                                                                                                                                                                                                                                                                                                                                                                                                                                                         |
|                               |                                                                                                                                                                                                                                                                                                                                                                                                                                                                                                                                                                                                                                                                                                                                                                                                                                                                                                                           |

SCHOLARONE™  
Manuscripts

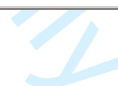

1  
2  
3 **Qualitative perspectives on the sustainability of sexual health continuous quality**  
4 **improvement in clinics serving remote Aboriginal communities in Australia**  
5

6 **Authors :** Praveena Gunaratnam, Kirby Institute, UNSW Sydney\*  
7 [pgunaratnam@kirby.unsw.edu.au](mailto:pgunaratnam@kirby.unsw.edu.au)  
8 Gill Schierhout, Kirby Institute, UNSW Sydney  
9 [gschierhout@kirby.unsw.edu.au](mailto:gschierhout@kirby.unsw.edu.au)  
10 Jenny Brands, Menzies School of Health Research  
11 [Jenny.Brands@menzies.edu.au](mailto:Jenny.Brands@menzies.edu.au)  
12 Lisa Maher, Kirby Institute, UNSW Sydney; Burnet Institute, Melbourne  
13 [lmaher@kirby.unsw.edu.au](mailto:lmaher@kirby.unsw.edu.au)  
14 Ross Bailie, University of Sydney, University Centre for Rural Health,  
15 Northern Rivers, NSW  
16 [ross.bailie@sydney.edu.au](mailto:ross.bailie@sydney.edu.au)  
17 James Ward, South Australia Health and Medical Research Institute  
18 [James.Ward@sahmri.com](mailto:James.Ward@sahmri.com)  
19 Rebecca Guy, Kirby Institute, UNSW Sydney  
20 [rguy@kirby.unsw.edu.au](mailto:rguy@kirby.unsw.edu.au)  
21 Alice Rumbold, Robinson Research Institute, University of Adelaide  
22 [alice.rumbold@adelaide.edu.au](mailto:alice.rumbold@adelaide.edu.au)  
23 Nathan Ryder, School of Medicine and Public Health, University of Newcastle  
24 [Nathan.ryder@hnehealth.nsw.gov.au](mailto:Nathan.ryder@hnehealth.nsw.gov.au);  
25 Christopher K Fairley, Melbourne Sexual Health Centre; Central Clinical  
26 School, Monash University  
27 [CFairley@mshc.org.au](mailto:CFairley@mshc.org.au)  
28 Basil Donovan, Kirby Institute, UNSW Sydney; Sydney Sexual Health Centre  
29 [bdonovan@kirby.unsw.edu.au](mailto:bdonovan@kirby.unsw.edu.au)  
30 Liz Moore, Aboriginal Medical Services Alliance Northern Territory  
31 [liz.moore@amsant.org.au](mailto:liz.moore@amsant.org.au)  
32 John Kaldor, Kirby Institute, UNSW Sydney  
33 [jkaldor@kirby.unsw.edu.au](mailto:jkaldor@kirby.unsw.edu.au)  
34 Stephen Bell, Kirby Institute, UNSW Sydney  
35 [sbell@kirby.unsw.edu.au](mailto:sbell@kirby.unsw.edu.au)  
36  
37  
38

39 \*Corresponding author  
40

41 **Word Count:** 3998  
42

43 **Proposed Journal:** BMJ Open  
44  
45  
46  
47  
48  
49  
50  
51  
52  
53  
54  
55  
56  
57  
58  
59  
60

**Abstract**

- Objectives:* To examine barriers and facilitators to sustaining a sexual health continuous quality improvement (CQI) program in clinics serving remote Aboriginal communities in Australia.
- Design:* Qualitative study.
- Setting:* Primary health care services serving remote Aboriginal communities in the Northern Territory, Australia.
- Participants:* Seven of the 11 regional sexual health coordinators responsible for supporting the Northern Territory Government Remote Sexual Health Program.
- Methods:* Semi-structured in-depth interviews conducted in person or by telephone; data were analysed using an inductive and deductive thematic approach.
- Results:* Despite uniform availability of CQI tools and activities, sexual health CQI implementation varied across the Northern Territory. Participant narratives identified five factors enhancing the uptake and sustainability of sexual health CQI. At clinic level, these included adaptation of existing CQI tools for use in specific clinic contexts and risk environments (e.g. a syphilis outbreak), local ownership of CQI processes, and management support for CQI. At a jurisdictional level, factors included the positive framing of CQI as a tool to identify and act on areas for improvement, and regional facilitation of clinic level CQI activities. Three barriers were identified, including the significant workload associated with acute and chronic care in Aboriginal primary care services, high staff turnover, and lack of Aboriginal staff.
- Conclusions:* This study contributes to the growing evidence on how CQI approaches may improve sexual health in remote Australian Aboriginal communities. Enhancing sustainability of sexual health CQI in this context will require ongoing regional facilitation, efforts to build local ownership of CQI processes, and management of competing demands on health service staff.
- Key words:** sexual health, Aboriginal, Australia, continuous quality improvement, primary health care, remote

## STRENGTHS AND LIMITATIONS OF THIS STUDY

- Using in-depth interviews with sexual health coordinators working in the Northern Territory, Australia, we examine barriers and facilitators to sustaining a sexual health continuous quality improvement (CQI) program in clinics serving remote Aboriginal communities.
- Participant narratives suggest adaptation of existing CQI tools for use in specific clinic contexts, local ownership, management support for CQI, positive framing of CQI as a tool to identify and act on areas for improvement, and regional facilitation of clinic level CQI activities are facilitators of sexual health CQI. Barriers are the significant workload associated with acute and chronic care in Aboriginal primary care services, high staff turnover, and lack of Aboriginal staff.
- Our study adds to existing research on sexual health and CQI in remote Australian settings.
- The authors of this paper all have ongoing involvement in Aboriginal health, sexual health and CQI in Australia, as researchers, service providers, managers and policy makers.
- A limitation of our study is that we could only speak to sexual health coordinators employed by the Northern Territory government health sector. Findings therefore cannot be generalised to the Aboriginal community-controlled health sector.

## FUNDING STATEMENT

The STRIVEplus study is funded through a National Health and Medical Research Council Partnership Grant (APP1060471). The funder played no role in design or implementation of this study.

## COMPETING INTEREST STATEMENT

None declared.

## AUTHOR CONTRIBUTIONS

PG, GS, JB and SB designed the study. PG, JB and SB conducted data collection. PG and JB undertook analysis of the data and PG, GS and SB led on drafting of the manuscript. All other authors (LM, RB, JW, RG, AR, NR, CKF, BD, LM, JK) assisted with interpretation of data and review of successive drafts of the manuscript. All authors read and approved the final manuscript.

## DATA SHARING STATEMENT

NA

## INTRODUCTION

Residents in remote Aboriginal and Torres Strait Islander (hereafter referred to as 'Aboriginal') communities in Australia experience high rates of sexually transmissible infections (STIs), estimated in one large, multi-community study at 10%, 11% and 18% respectively for gonorrhoea, chlamydia and syphilis (1). Clinical guidelines for these communities recommend at least annual STI testing, timely treatment, partner notification and regular re-testing, particularly those under 35 years old (2, 3). However, recent estimates indicate that annual STI testing coverage in remote communities is still only 20%, with lower rates in men than in women (4).

Since the 1990s, continuous quality improvement (CQI) approaches – typically consisting of 'plan-do-study-act' cycles to monitor the functioning of organisational systems and identify and implement improvements (5) – have been used to improve health care quality and outcomes associated with, for example, chronic disease (6-10). In Australia, Aboriginal Community Controlled Health Services (ACCHS) and government-run health services providing primary health care to Aboriginal communities have used CQI extensively to make evidence-based improvements in clinical care (11-13).

Between 2011-2014, the STRIVE (STIs in Remote communities, ImproVed and Enhanced primary care) trial was conducted in 67 remote communities in the Northern Territory (NT), Queensland and Western Australia (14). STRIVE demonstrated that a clinic level sexual health CQI program supported by regional dedicated sexual health coordinators (14-16) could improve STI testing rates (15), with aspects of the CQI program becoming normalised in clinical practice (16). However, testing increases were from a low baseline and did not lead to lower STI prevalence over the time frame of the trial (15).

Elements of the STRIVE CQI approach were incorporated into the NT Government Remote Sexual Health Program (3). The program employs regionally-based sexual health coordinators to work with government-run primary care services to improve STI testing and treatment. Their roles include providing feedback on STI control through audits and review of clinical data; annual discussions with staff to assess and make recommendations for improving clinic-wide systems that support STI control (systems assessments); and sexual health education and staff training (3).

To gain insight into CQI practice for STI control in the NT since the STRIVE study finished in 2014, and to explore factors affecting the long-term sustainability of this approach in government-run health services, we conducted qualitative interviews with sexual health coordinators. Data were collected as part of a new study called STRIVEplus – a long-term observational study of sexual health CQI in the NT between 2015-2019.

## METHODS

### Setting

The NT of Australia covers 1.4 million square kilometres, with an estimated resident population of 230,000, of whom 26% are Aboriginal (compared to 3% nationally) (17). Most (79%) Aboriginal residents in the NT live in remote areas (18), and are served by two types of primary care services – ACCHS or NT government health services. Remote clinics are primarily staffed by Aboriginal health workers or registered nurses (often on short-term fly

1  
2  
3 in-fly out contracts) with support from resident or visiting general practitioners and other  
4 specialist or allied health providers (19).  
5

6 The setting for this study was the NT government health service sector, specifically the NT  
7 Government Remote Sexual Health Program. This program coordinates support for sexual  
8 health service delivery across both the Top End Health Service (covering approximately 35%  
9 of the geographic area and 80% of the population) and Central Australia Health Service (65%  
10 of the geographic area and 20% of the population) (18).  
11

## 12 **Study participants**

13  
14 All sexual health coordinators working in the NT Department of Health (n=11) in 2016 were  
15 approached up to three times and invited to participate in an in-depth qualitative interview.  
16 This resulted in seven sexual health coordinators providing informed consent to be  
17 interviewed between March 2016 and January 2017. Of the seven, three worked in Central  
18 Australia and four in the Top End; six were women; six had worked in their current role for  
19 more than one year, while one had started the role eight months prior to the interview but had  
20 previously worked in a specialist sexual health clinic for more than one year. Coordinators  
21 worked with between 4 to 11 services, and one also had a region-wide function. None were  
22 Aboriginal.  
23  
24

## 25 **Data Collection**

26  
27 A semi-structured qualitative interview guide was developed to explore participants'  
28 understandings of CQI for sexual health; the post-STRIVE trial transition; factors influencing  
29 the uptake and sustained application of CQI approaches; and perceptions of the impact of  
30 CQI on sexual health service provision. Interviews lasted between 25-80 minutes and were  
31 conducted by three interviewers (JB, PG, SB) in person (n=2) or by telephone (n=5).  
32  
33

## 34 **Data analysis**

35  
36 Interviews were audio-recorded and transcribed verbatim before uploading into QRS NVivo  
37 version 11 for analysis (QRS International Pty Ltd, Melbourne, Australia). A thematic  
38 analysis approach (20) was used by two team members (PG and JB). First, we familiarized  
39 ourselves with the data through reading and re-reading of transcripts, noting down initial  
40 thematic ideas and 'theoretical memos' (20) as analytical reminders for making links between  
41 different findings. Second, a codebook consisting of parent and child nodes was developed  
42 using inductive (codes from initial reads of the interview data) and deductive (codes from  
43 existing literature and the discussion guides) data categorization techniques. Third, all  
44 transcripts were coded systematically, whilst reviewing and editing the codebook according  
45 to the data.  
46  
47

## 48 **Ethics**

49  
50 Approval was obtained from Central Australian Human Research Ethics Committee (HREC  
51 15-298) and the Human Research Ethics Committee of the NT Department of Health and the  
52 Menzies School of Health Research (HREC 2015-2374).  
53  
54  
55  
56  
57



## RESULTS

### Understanding of sexual health CQI

Participants consistently described CQI for improved sexual health service delivery as an iterative, ongoing process used to assess current performance of a service, identify strengths and weaknesses, design strategies to improve performance, and review data to evaluate the impact of those strategies.

You make a plan, you do the intervention, then you review what you've done, and then you act and improve the deficiencies, or you go with the strengths and try and address the weaknesses. (SH3, Central Australia)

All participants felt that CQI activities could lead to a higher quality of sexual health care by helping staff to understand who is at risk and to identify gaps in service delivery. They also felt that the data collected for sexual health CQI could drive improvements by allowing services to see how they compare and to gauge their performance independent of targets.

The clinics don't know the other clinics on [the list]. They just see where they rank and it makes it pretty evident of how well they're doing... and just focusing the discussion on missed opportunities. (SH2, Central Australia)

### Current sexual health CQI practice

Sexual health coordinators reported varying levels of sexual health CQI engagement and capability in the services they worked with. At one end of the spectrum were services which regularly reviewed data and deployed strategies to address gaps and improve key indicators, such as STI testing. For these services, capability in sexual health CQI appeared to be part of a broader capability and interest in improving performance across different aspects of care:

[Certain services are] always working to their performance indicators... they're always checking on the traffic light reports to see whether they've got their adult health checks done... we just recently realised there was a gap between the 15 to 24 year olds so we've gone through the communities and done some targeted screening. (SHC7, Top End)

In contrast, other services were perceived as undertaking less sexual health CQI activity, or as requiring support from a sexual health coordinator to do so.

They need constant prompts, because what you find is if you go out there, their rates of testing have picked up. That's what happens, when you go out and give them some education, their testing will pick up. You can't take your eye off the ball. (SHC5, Top End)

Higher levels of sexual health CQI capability were attributed to greater managerial support, and CQI data and activity being used to identify and act on areas for improvement.

The two [clinics] that I'm thinking of that do well is because their clinic manager is really onto it and made it a priority. They've been around for a while, those clinic managers. (SH2, Central Australia)



### ***CQI activities, tools and related actions for STI control***

Incorporation of the STRIVE CQI approach into the sexual health coordinators' roles included the use of specific tools – described in detail elsewhere (14, 19) – particularly in relation to increasing testing. In summary, these tools included audits, systems assessments, data review and action plans to identify specific activities to improve gaps in service delivery. In addition, 'traffic light reports' is a management tool used by the NT government which draws automated extraction of data from the Primary Care Information System (PCIS) used by government services to report quarterly on selected clinical performance indicators. One participant noted that visual data reports were particularly appreciated by clinic staff.

I've done the stats, my system assessments tools ... that's a very powerful tool because the clinic will sit back and go, 'oh, wow' ... They'll look at the spider graphs and they really get into that visual stuff to find out their strengths and weaknesses and how they can improve. (SH5, Top End)

Participants felt the CQI process should identify simple but reproducible actions to improve care. To increase testing and re-testing, some participants cited specific actions including integration of sexual health into routine adult health checks, the use of recalls and reminder cards, and prompts embedded in the electronic health information system.

Now that sexual health is integrated into the adult health check, through the men's and women's checks, that has been the single most [important change]. Putting in recalls for sexual health in PCIS has actually improved it. Making sure that I'm auditing so that we know if somebody's not being followed up. Then we ask the hard questions why and follow that through. (SH7, Top End)

There's things like putting recalls on for test for re-infection, using the STI template which is embedded in PCIS and things like that as a prompt to help better sexual health delivery. (SH4, Top End)

One participant reported that services engaged in activities such as regular monitoring of individual migration within and between communities, in order to be more responsive to their clients' needs for sexual health care. While this element of patient-centred care does not fit the definition of CQI, the co-ordinator considered this to be closely related to a CQI activity that helps to identify gaps in service delivery.

[Service staff] know to keep an eye out for those people that have been out in the long grass [away from community for a period of time] and coming back to community. That's that undercurrent of stuff that goes on that we talk about and make sure you're checking, that sort of non-documented CQI that you do without doing CQI. (SH7, Top End)

Some participants reported that tools such as the STRIVE systems assessment required adaptation for ongoing use. One co-ordinator noted the increased demand for this type of assessment across different aspects of care, and reluctance among clinic managers to allow staff to participate in what, during the STRIVE trial, were perceived to be lengthy assessment meetings.

1  
2  
3 Now every program in the NT has a systems assessment attached to it. When we went  
4 to do it [systems assessment] last year my boss said to me 'No, we're not', they kept  
5 cancelling it. And I said 'Look, why don't we do it, why don't you allow us to have  
6 half an hour?' And they said 'Yeah, alright, we can let you have half an hour'. And in  
7 that time we did the system assessment. It was quick and really targeted. (SH7, Top  
8 End)  
9

## 10 **Current challenges to implementation of CQI for sexual health**

### 11 ***Prioritisation of sexual health CQI***

12  
13  
14 The significant workload associated with acute and chronic conditions in the patient  
15 population (5, 21-23) meant primary care staff were not able to prioritise sexual health. This  
16 impacted both on sexual health activities within daily clinic practice, and on the time  
17 available for CQI during sexual health coordinator visits.  
18

19  
20 Clinics are bombarded by everything. ...STIs, I mean it's mostly asymptomatic,  
21 probably not going to cause too much trouble... it's not a huge priority in engagement  
22 in Indigenous people. (SH2, Central Australia)  
23

24 When I'm out in the community I'll give a talk, depending on how much time I have.  
25 Sometimes I'm really pressured for time, they'll only allocate me so much time  
26 depending what's going on in the community or in the clinic. (SH5, Top End)  
27

28  
29 Some participants reported the substantial work in surveillance and response as a result of an  
30 outbreak of infectious syphilis, ongoing since 2013 in remote communities in the Northern  
31 Territory (24). However, one participant felt the outbreak increased the perceived importance  
32 of sexual health and the use of CQI to drive STI testing and follow up.  
33

34 We have ... reports where we can pull out who in the community hasn't had an STI  
35 check in the last 12 months, and who hasn't had a syphilis check. Those have been  
36 extremely valuable... It gives [clinic managers] a focus, like it gives them people that  
37 they can actually go and [test], rather than saying, 'Look, you've only tested 40% of  
38 your people' (SH2, Central Australia)  
39

### 40 ***Lack of staff and staff turnover***

41  
42 Staff shortages and high staff turnover were mentioned by most participants as presenting a  
43 significant challenge to ongoing quality sexual health CQI.  
44

45  
46 I will go [to a clinic] and do the action plan, and then I'll go back the next time and  
47 there'll be new staff, and they won't know what you're talking about. (SH5, Top End)  
48

49 One participant reported that the lack of Aboriginal health staff increasingly affects the  
50 ability to provide high quality, culturally appropriate health services. It was perceived as  
51 important to recruit, train and support younger Aboriginal community members to work in  
52 health services, particularly as community members who have been performing these  
53 functions retire.  
54

1  
2  
3 You're finding less and less Indigenous staff in the health centres. Less [Aboriginal]  
4 health practitioners. New [non-Aboriginal] staff, even if they're good and conscientious  
5 and want to do everything right, still have difficulty with communication, going to  
6 different areas. They don't know the people. Some of them aren't there long enough to  
7 build up that rapport with people and get their trust. (SH6 Top End)  
8

## 9 **Future considerations in sexual health CQI**

### 10 ***Local ownership of CQI processes***

11  
12  
13 Some participants believed that, while coordinators facilitated the process, sexual health CQI  
14 processes should ultimately be owned by staff and managers at primary care services; and  
15 could be used to advocate for additional resources to improve sexual health service delivery.  
16

17  
18 [Our role is] a facilitation role. You're allowing that information and asking the right  
19 questions to draw out more answers, being a bit directive but allowing the clinicians to  
20 come up with it themselves so they have ownership of it. (SH4, Top End)  
21

22  
23 If sexual health isn't a priority because they've only had one staff and they're doing  
24 emergencies all day, they can turn around to management and say, 'Yeah, sure, give me  
25 more bloody staff', and it's a tool for them too. (SH3, Central Australia)  
26

27 The level of facilitation required from sexual health coordinators to sustain sexual health CQI  
28 was perceived by some participants as dependent on the clinic and clinic manager.  
29

30 For some communities [clinics] I don't think they need it [facilitation and support to  
31 conduct CQI] as much as others, and again, I think that's really dependent on the actual  
32 community [clinic] and on the clinic manager. (SH2, Central Australia)  
33

### 34 ***Competing CQI demands***

35  
36 Participants discussed the tension between maintaining sexual health-specific CQI efforts or  
37 integrating them into broader CQI practices (13, 25).  
38

39  
40 Everyone works and audits and does their quality improvement in such silos that there  
41 really seems to be no integration of services talking to each other. (SH2, Central  
42 Australia)  
43

44 Some participants reported that separating sexual health CQI from broader CQI efforts  
45 creates confusion and increases the burden on services involved in multiple systems and  
46 processes. However, most participants also felt that sexual health-specific CQI, integrated  
47 within existing primary care systems and processes, was critical to ensure sexual health is  
48 addressed. Without specific processes, sexual health could easily be overlooked due to other  
49 service priorities, and because of patient and health worker discomfort.  
50

51 I do think having a dedicated sexual health team looking at CQI does bring it into focus  
52 and I think certainly does engage practitioners to reflect on, you know, how well they  
53 do incorporate sexual health practices into their everyday practice. (SH1, Central  
54 Australia)  
55  
56  
57  
58  
59  
60

1  
2  
3 ... it's like a big shame job for everyone. Like clinicians are uncomfortable to do it,  
4 patients are uncomfortable, so I think it needs to be highlighted ... (SH4, Top End)  
5

### 6 ***Information systems and CQI***

7

8 Understanding and communicating service activity data was perceived by participants as  
9 central to motivating action to improve service delivery. The current patient information  
10 management system used by government health services in the NT was perceived to have  
11 improved, particularly with respect to automated reporting. However, some participants  
12 suggested that the system could be simpler and more responsive to changes in clinical  
13 guidelines.  
14

15  
16 I mean health nowadays is so changeable, you know we're coming up with different  
17 testing abilities, different... I think you have to have an information system that can  
18 keep up, be flexible and that can change. PCIS was a bit difficult at times to navigate  
19 around and get things changed. (SH1, Central Australia)  
20

21 One participant stressed that information management systems should not just produce  
22 aggregated reports but also have capacity to be used to support clinicians in individual patient  
23 management, by allowing clinic staff to identify which patients were not being followed up  
24 for treatment or recalled for re-testing, for example.  
25

26  
27 You can turn around and you can say, 'Right, well this is the reason that we're not  
28 performing because half the people aren't actually living in the community'... we  
29 should be able to get a list of the patients easily and be able to go out to the clinics and  
30 give them information, and if need be, do the targeted quality audits that can actually  
31 drill in and make clear changes. (SH3, Central Australia)  
32

## 33 **DISCUSSION**

34

35 Our study contributes to existing research on sexual health and CQI in remote Australian  
36 settings (11, 19, 21, 26, 27) by identifying factors at clinic and jurisdictional levels that both  
37 improve and impede the uptake and sustainability of sexual health CQI practices.  
38

39  
40 At the clinic level, an important factor perceived as enhancing the uptake and sustainability  
41 of sexual health CQI was the adaptation of STRIVE CQI tools and reports for use in specific  
42 clinic contexts, and for responding to a risk environment such as the syphilis outbreak. The  
43 need for adaptation of CQI activities to ensure they are continually fit for purpose has been  
44 documented elsewhere (7, 28). This study also identified activities that are not traditionally  
45 defined as clinical CQI, such as monitoring movement between and within communities, but  
46 which assisted service practitioners with monitoring progress and implementing new  
47 strategies to improve sexual health outcomes.  
48

49  
50 Two other clinic-level factors that support sexual health CQI included local ownership of,  
51 and management support for, these processes. However, these were enabled by two  
52 jurisdictional level factors. The first was regional facilitation of ongoing clinic-level sexual  
53 health CQI by sexual health coordinators which helped to raise the profile of sexual health  
54 within services, including with managers. Previous research has illustrated the pivotal role of  
55 a regional sexual health coordinator function in effective STI interventions in remote  
56 Aboriginal communities (19, 29). The second was the positive framing of CQI as a tool to  
57

1  
2  
3 identify and act on areas for improvement. At the jurisdictional level, ongoing general CQI  
4 implementation in the NT is attributed to high levels of policy support compared to other  
5 jurisdictions in Australia (28).  
6

7 Our study also identified factors that impede the implementation and sustainability of sexual  
8 health CQI. As identified in other Australian studies (5, 21-23), participants described how  
9 the significant demands of acute and chronic care on Aboriginal primary care services render  
10 sexual health CQI a relatively low priority. As has occurred with chronic disease (30), targets  
11 could be used to encourage a greater focus on sexual health. Exploring team structures and  
12 workflow strategies which allow sufficient focus on preventive care (31) to reduce the  
13 likelihood of sexual health being continually overshadowed by more immediate priorities has  
14 also been suggested as a strategy to deal with this challenge (32).  
15

16 Workforce shortages and high staff turnover were also described as limiting ongoing staff  
17 participation in sexual health CQI activities. The lack of experienced Aboriginal health staff  
18 was highlighted as particularly problematic, due to the strength of community relationships  
19 and trust that Aboriginal health workers and practitioners can build (23, 32). These issues  
20 have been documented elsewhere as barriers to the provision of quality care in services that  
21 provide health care to Aboriginal populations (19, 21, 22, 26, 32), and may be particularly  
22 important in delivery of quality sexual health care. Strategies to address barriers to Aboriginal  
23 workforce participation have the potential to have positive effects on sexual health CQI in  
24 these communities and should be supported.  
25  
26

27 Finally, our findings indicate three considerations affecting the sustainability of sexual health  
28 CQI. First, while coordinators explained that sexual health-specific CQI ensured a focus on  
29 this difficult health area (5, 21-23), they acknowledged the need to reduce the burden on  
30 clinics from multiple CQI programs. Ongoing monitoring of recently available jurisdiction-  
31 wide sexual health indicators will help understand if this type of measure is sufficient to  
32 increase the perceived importance of sexual health and STI control within primary health care  
33 clinics. However, there is also a need to identify which specific CQI tools and activities could  
34 be incorporated into generic CQI processes to ensure that sexual health is not overlooked.  
35  
36

37 Second, findings stress the important contribution of regional sexual health coordinators and  
38 support structures to ongoing service improvements and CQI participation in the NT,  
39 particularly in the context of high staff turnover. Re-assessment of how support for sexual  
40 health CQI is funded and managed may be indicated, and whether this is incorporated within  
41 infectious disease surveillance and response, as is largely the case now, or more broadly as  
42 part of primary care service development.  
43  
44

45 Third, access to, and use of, high quality information systems and data was seen as a major  
46 strength of sexual health CQI. The use of benchmarking to motivate action and improvement  
47 by allowing services to compare themselves to others is similar to findings from other  
48 research (6, 11, 19, 32, 33). The current information system used by government clinics was  
49 perceived to be largely supportive of CQI efforts, including the regular review of data, though  
50 simplification and ongoing flexibility were recommended. This points to the need for an  
51 evolving and responsive health information system.  
52  
53

54 In interpreting our findings, it must be noted that only seven of the eleven sexual health  
55 coordinators employed by the NT government were interviewed, others may have provided  
56 different perspectives. Perspectives on sexual health specific versus broader CQI were also  
57  
58



1  
2  
3 influenced by the role of participants to provide the former. Also the data collection strategies  
4 – involving three interviewers, and conducting interviews both in person and by telephone –  
5 may have increased the variation among individual responses. Findings may not be  
6 generalisable to ACCHS, given this focus on government-run services. As part of  
7 STRIVEplus, further qualitative research focused on jurisdiction-level key informants and  
8 health service staff, across both the government and the community-controlled sectors, will  
9 address these gaps.  
10

## 11 CONCLUSION

12  
13 CQI is only one of several strategies needed to reduce high STI incidence and prevalence  
14 among Aboriginal Australians in remote communities. To ensure sustainability at the service  
15 and state level, sexual health CQI activities require responsive and efficient information  
16 systems, and, in the context of high staff turnover, a regional coordination function.  
17 Strategies to address barriers to the uptake and sustainability of sexual health CQI must be  
18 developed and evaluated, to reduce the high burden of disease associated with STIs in this  
19 population.  
20  
21

## 22 REFERENCES

- 23  
24 1. Silver BJ, Guy RJ, Wand H, Ward J, Rumbold AR, Fairley CK, et al. Incidence of  
25 curable sexually transmissible infections among adolescents and young adults in remote  
26 Australian Aboriginal communities: analysis of longitudinal clinical service data. *Sex Transm*  
27 *Infect.* 2015;91(2):135-41.
- 28  
29 2. Central Australian Rural Practitioners Association. CARPA Standard Treatment  
30 Manual, 7th edn. Alice Springs: Central Australian Rural Practitioners Association Inc. 2017  
31 [Available from: <https://www.remotephmanuals.com.au/home.html> validated 29 January  
32 2018].
- 33  
34 3. Centre for Disease Control DoH, Northern Territory, . NT Guidelines for the  
35 Management of Sexually Transmitted Infections in the Primary Health Care Setting, 4th  
36 Edn.: Department of Health; 2016 [Available from:  
37 <http://digitallibrary.health.nt.gov.au/prodjspu/handle/10137/699> validated 29 January 2018].
- 38  
39 4. Hengel B, Wand H, Ward J, Rumbold A, Garton L, Taylor-Thomson D, et al. Patient,  
40 staffing and health centre factors associated with annual testing for sexually transmissible  
41 infections in remote primary health centres. *Sex Health.* 2017;14(3):274-81.
- 42  
43 5. Bailie RS, Si D, O'Donoghue L, Dowden M. Indigenous health: effective and  
44 sustainable health services through continuous quality improvement. *Med J Aust.*  
45 2007;186(10):525-7.
- 46  
47 6. Ferlie EB, Shortell SM. Improving the Quality of Health Care in the United Kingdom  
48 and the United States: A Framework for Change. *Milbank Q.* 2001;79(2):281-315.
- 49  
50 7. Lau R, Stevenson F, Ong BN, Dziedzic K, Treweek S, Eldridge S, et al. Achieving  
51 change in primary care—causes of the evidence to practice gap: systematic reviews of  
52 reviews. *Implement Sci.* 2016;11(1):40.
- 53  
54 8. Grol R, Grimshaw J. From best evidence to best practice: effective implementation of  
55 change in patients' care. *The Lancet.* 2007;362(9391):1225-30.
- 56  
57 9. McElwaine KM, Freund M, Campbell EM, Bartlem KM, Wye PM, Wiggers JH.  
58 Systematic review of interventions to increase the delivery of preventive care by primary care  
59 nurses and allied health clinicians. *Implement Sci.* 2016;11(1):50.  
60

10. Tricco AC, Ivers NM, Grimshaw JM, Moher D, Turner L, Galipeau J, et al. Effectiveness of quality improvement strategies on the management of diabetes: a systematic review and meta-analysis. *Lancet*. 2012;379(9833):2252-61.
11. Gardner KL, Dowden M, Togni S, Bailie R. Understanding uptake of continuous quality improvement in Indigenous primary health care: lessons from a multi-site case study of the Audit and Best Practice for Chronic Disease project. *Implement Sci*. 2010;5.
12. Gibson-Helm ME, Teede HJ, Rumbold AR, Ranasinha S, Bailie RS, Boyle JA. Continuous quality improvement and metabolic screening during pregnancy at primary health centres attended by Aboriginal and Torres Strait Islander women. *Med J Aust*. 2015;203(9):369-70.
13. Allen and Clarke. Evaluation of the Northern Territory Continuous Quality Improvement (CQI) Investment Strategy: Summary report. Department of Health, Canberra.; 2016.
14. Ward J, McGregor S, Guy RJ, Rumbold AR, Garton L, Silver BJ, et al. STI in remote communities: improved and enhanced primary health care (STRIVE) study protocol: a cluster randomised controlled trial comparing 'usual practice' STI care to enhanced care in remote primary health care services in Australia. *BMC Infect Dis*. 2013;13:425.
15. Ward J, Guy RJ, Rumbold AR, McGregor S, Wand H, McManus H, et al. A pragmatic stepped wedge cluster randomised trial of continuous quality improvement strategies to improve the control of sexually transmissible infections in remote Australian Aboriginal communities. forthcoming.
16. Hengel B, S. B, L. G, J. W, Rumbold A, D. T-T, et al. Perspectives of primary care staff on the implementation of a sexual health quality improvement program: A qualitative study in remote aboriginal communities in Australia. *BMC Health Serv Res*. 2018;18(1).
17. Australian Bureau of Statistics. 2016 Census QuickStats - Northern Territory 2016 [Available from: [http://quickstats.censusdata.abs.gov.au/census\\_services/getproduct/census/2016/quickstat/7?opendocument](http://quickstats.censusdata.abs.gov.au/census_services/getproduct/census/2016/quickstat/7?opendocument) validated 9 August 2018].
18. Northern Territory Department of Health. 2016-17 Annual Report: NT Health; 2017 [Available from: <http://digitallibrary.health.nt.gov.au/prod/jspui/handle/10137/1417> validated 29 January 2018].
19. Hengel B, Bell S, Garton L, Ward J, Rumbold A, Taylor-Thomson D, et al. Perspectives of primary health care staff on the implementation of a sexual health quality improvement program: a qualitative study in remote aboriginal communities in Australia. *BMC Health Serv Res*. 2018;18(1):230.
20. Strauss A, Corbin J. Basics of qualitative research. Thousand Oaks: Sage; 1990.
21. Hengel B, Guy R, Garton L, Ward J, Rumbold A, Taylor-Thomson D, et al. Barriers and facilitators of sexually transmissible infection testing in remote Australian Aboriginal communities: results from the Sexually Transmitted Infections in Remote Communities, Improved and Enhanced Primary Health Care (STRIVE) Study. *Sex Health*. 2015;12(1):4-12.
22. Hengel B, Maher L, Garton L, Ward J, Rumbold A, Taylor-Thomson D, et al. Reasons for delays in treatment of bacterial sexually transmissible infections in remote Aboriginal communities in Australia: a qualitative study of healthcentre staff. *Sex Health*. 2015;12(4):341-7.
23. Newham J, Schierhout G, Bailie R, Ward PR. 'There's only one enabler; come up, help us': staff perspectives of barriers and enablers to continuous quality improvement in Aboriginal primary health-care settings in South Australia. *Aust J Prim Health*. 2016;22(3):244-54.
24. Bright A, Dups J. Infectious and congenital syphilis notifications associated with an ongoing outbreak in northern Australia. *Commun Dis Intell Q Rep*. 2016;40(1):E7-10.



- 1  
2  
3 25. The Lowitja Institute. Recommendations for a National CQI Framework for  
4 Aboriginal and Torres Strait Islander Primary Health Care, 2014 [Available from:  
5 <http://www.health.gov.au/internet/main/publishing.nsf/content/cqi-framework-atsih> validated  
6 29 January 2018].
- 7 26. Schierhout G, Hains J, Si D, Kennedy C, Cox R, Kwedza R, et al. Evaluating the  
8 effectiveness of a multifaceted, multilevel continuous quality improvement program in  
9 primary health care: developing a realist theory of change. *Implement Sci.* 2013;8(1):119.
- 10 27. Gardner K, Bailie R, Si D, O'Donoghue L, Kennedy C, Liddle H, et al. Reorienting  
11 primary health care for addressing chronic conditions in remote Australia and the South  
12 Pacific: review of evidence and lessons from an innovative quality improvement process.  
13 *Aust J Rural Health.* 2011;19(3):111-7.
- 14 28. Woods C, Carlisle K, Larkins S, Thompson SC, Tsey K, Matthews V, et al. Exploring  
15 Systems That Support Good Clinical Care in Indigenous Primary Health-care Services: A  
16 Retrospective Analysis of Longitudinal Systems Assessment Tool Data from High-Improving  
17 Services. *Front Public Health.* 2017;5(45).
- 18 29. Guy R, Ward JS, Smith KS, Su J-Y, Huang R-L, Tangey A, et al. The impact of  
19 sexually transmissible infection programs in remote Aboriginal communities in Australia: a  
20 systematic review. *Sex Health.* 2012;9(3):205-12.
- 21 30. Bailie J, Schierhout GH, Kelaher MA, Laycock AF, Percival NA, O'Donoghue LR, et  
22 al. Follow-up of Indigenous-specific health assessments - a socioecological analysis. *Med J*  
23 *Aust.* 2014;200(11):653-7.
- 24 31. Nattabi B, Girgis S, Matthews V, Bailie R, Ward JE. Clinic predictors of better  
25 syphilis testing in Aboriginal primary healthcare: a promising opportunity for primary  
26 healthcare service managers. *Aust J Prim Health.* 2018.
- 27 32. Bailie J, Matthews V, Laycock A, Schultz R, Burgess CP, Peiris D, et al. Improving  
28 preventive health care in Aboriginal and Torres Strait Islander primary care settings. *Global*  
29 *Health.* 2017;13(1):48.
- 30 33. Larkins S, Woods CE, Matthews V, Thompson SC, Schierhout G, Mitropoulos M, et  
31 al. Responses of Aboriginal and Torres Strait Islander Primary Health-Care Services to  
32 Continuous Quality Improvement Initiatives. *Front Public Health.* 2015;3:288.  
33  
34  
35  
36  
37  
38  
39  
40  
41  
42  
43  
44  
45  
46  
47  
48  
49  
50  
51  
52  
53  
54  
55  
56  
57  
58  
59  
60

# Reporting checklist for qualitative study.

Based on the SRQR guidelines.

## Instructions to authors

Complete this checklist by entering the page numbers from your manuscript where readers will find each of the items listed below.

Your article may not currently address all the items on the checklist. Please modify your text to include the missing information. If you are certain that an item does not apply, please write "n/a" and provide a short explanation.

Upload your completed checklist as an extra file when you submit to a journal.

In your methods section, say that you used the SRQR reporting guidelines, and cite them as:

O'Brien BC, Harris IB, Beckman TJ, Reed DA, Cook DA. Standards for reporting qualitative research: a synthesis of recommendations. *Acad Med.* 2014;89(9):1245-1251.

|                                            | Reporting Item                                                                                                                                                                                                                                          | Page Number |
|--------------------------------------------|---------------------------------------------------------------------------------------------------------------------------------------------------------------------------------------------------------------------------------------------------------|-------------|
|                                            | <a href="#">#1</a> Concise description of the nature and topic of the study identifying the study as qualitative or indicating the approach (e.g. ethnography, grounded theory) or data collection methods (e.g. interview, focus group) is recommended | 2           |
|                                            | <a href="#">#2</a> Summary of the key elements of the study using the abstract format of the intended publication; typically includes background, purpose, methods, results and conclusions                                                             | 2           |
| Problem formulation                        | <a href="#">#3</a> Description and significance of the problem / phenomenon studied: review of relevant theory and empirical work; problem statement                                                                                                    | 4           |
| Purpose or research question               | <a href="#">#4</a> Purpose of the study and specific objectives or questions                                                                                                                                                                            | 4           |
| Qualitative approach and research paradigm | <a href="#">#5</a> Qualitative approach (e.g. ethnography, grounded theory, case study, phenomenology, narrative research) and                                                                                                                          | 5           |

guiding theory if appropriate; identifying the research paradigm (e.g. postpositivist, constructivist / interpretivist) is also recommended; rationale. The rationale should briefly discuss the justification for choosing that theory, approach, method or technique rather than other options available; the assumptions and limitations implicit in those choices and how those choices influence study conclusions and transferability. As appropriate the rationale for several items might be discussed together.

|    |                           |                                                                                                                                                                                                                                                                                                                                                      |     |
|----|---------------------------|------------------------------------------------------------------------------------------------------------------------------------------------------------------------------------------------------------------------------------------------------------------------------------------------------------------------------------------------------|-----|
| 1  |                           |                                                                                                                                                                                                                                                                                                                                                      |     |
| 2  |                           |                                                                                                                                                                                                                                                                                                                                                      |     |
| 3  |                           |                                                                                                                                                                                                                                                                                                                                                      |     |
| 4  |                           |                                                                                                                                                                                                                                                                                                                                                      |     |
| 5  |                           |                                                                                                                                                                                                                                                                                                                                                      |     |
| 6  |                           |                                                                                                                                                                                                                                                                                                                                                      |     |
| 7  |                           |                                                                                                                                                                                                                                                                                                                                                      |     |
| 8  |                           |                                                                                                                                                                                                                                                                                                                                                      |     |
| 9  |                           |                                                                                                                                                                                                                                                                                                                                                      |     |
| 10 |                           |                                                                                                                                                                                                                                                                                                                                                      |     |
| 11 |                           |                                                                                                                                                                                                                                                                                                                                                      |     |
| 12 |                           |                                                                                                                                                                                                                                                                                                                                                      |     |
| 13 |                           |                                                                                                                                                                                                                                                                                                                                                      |     |
| 14 | Researcher                | <a href="#">#6</a>                                                                                                                                                                                                                                                                                                                                   | 5   |
| 15 | characteristics and       |                                                                                                                                                                                                                                                                                                                                                      |     |
| 16 | reflexivity               | Researchers' characteristics that may influence the research, including personal attributes, qualifications / experience, relationship with participants, assumptions and / or presuppositions; potential or actual interaction between researchers' characteristics and the research questions, approach, methods, results and / or transferability |     |
| 17 |                           |                                                                                                                                                                                                                                                                                                                                                      |     |
| 18 |                           |                                                                                                                                                                                                                                                                                                                                                      |     |
| 19 |                           |                                                                                                                                                                                                                                                                                                                                                      |     |
| 20 |                           |                                                                                                                                                                                                                                                                                                                                                      |     |
| 21 |                           |                                                                                                                                                                                                                                                                                                                                                      |     |
| 22 |                           |                                                                                                                                                                                                                                                                                                                                                      |     |
| 23 |                           |                                                                                                                                                                                                                                                                                                                                                      |     |
| 24 |                           |                                                                                                                                                                                                                                                                                                                                                      |     |
| 25 | Context                   | <a href="#">#7</a>                                                                                                                                                                                                                                                                                                                                   | 4-5 |
| 26 |                           | Setting / site and salient contextual factors; rationale                                                                                                                                                                                                                                                                                             |     |
| 27 |                           |                                                                                                                                                                                                                                                                                                                                                      |     |
| 28 | Sampling strategy         | <a href="#">#8</a>                                                                                                                                                                                                                                                                                                                                   | 5   |
| 29 |                           | How and why research participants, documents, or events were selected; criteria for deciding when no further sampling was necessary (e.g. sampling saturation); rationale                                                                                                                                                                            |     |
| 30 |                           |                                                                                                                                                                                                                                                                                                                                                      |     |
| 31 |                           |                                                                                                                                                                                                                                                                                                                                                      |     |
| 32 |                           |                                                                                                                                                                                                                                                                                                                                                      |     |
| 33 |                           |                                                                                                                                                                                                                                                                                                                                                      |     |
| 34 |                           |                                                                                                                                                                                                                                                                                                                                                      |     |
| 35 | Ethical issues pertaining | <a href="#">#9</a>                                                                                                                                                                                                                                                                                                                                   | 5   |
| 36 | to human subjects         | Documentation of approval by an appropriate ethics review board and participant consent, or explanation for lack thereof; other confidentiality and data security issues                                                                                                                                                                             |     |
| 37 |                           |                                                                                                                                                                                                                                                                                                                                                      |     |
| 38 |                           |                                                                                                                                                                                                                                                                                                                                                      |     |
| 39 |                           |                                                                                                                                                                                                                                                                                                                                                      |     |
| 40 | Data collection methods   | <a href="#">#10</a>                                                                                                                                                                                                                                                                                                                                  | 5   |
| 41 |                           | Types of data collected; details of data collection procedures including (as appropriate) start and stop dates of data collection and analysis, iterative process, triangulation of sources / methods, and modification of procedures in response to evolving study findings; rationale                                                              |     |
| 42 |                           |                                                                                                                                                                                                                                                                                                                                                      |     |
| 43 |                           |                                                                                                                                                                                                                                                                                                                                                      |     |
| 44 |                           |                                                                                                                                                                                                                                                                                                                                                      |     |
| 45 |                           |                                                                                                                                                                                                                                                                                                                                                      |     |
| 46 |                           |                                                                                                                                                                                                                                                                                                                                                      |     |
| 47 |                           |                                                                                                                                                                                                                                                                                                                                                      |     |
| 48 |                           |                                                                                                                                                                                                                                                                                                                                                      |     |
| 49 |                           |                                                                                                                                                                                                                                                                                                                                                      |     |
| 50 | Data collection           | <a href="#">#11</a>                                                                                                                                                                                                                                                                                                                                  | 5   |
| 51 | instruments and           | Description of instruments (e.g. interview guides, questionnaires) and devices (e.g. audio recorders) used for data collection; if / how the instruments(s) changed over the course of the study                                                                                                                                                     |     |
| 52 | technologies              |                                                                                                                                                                                                                                                                                                                                                      |     |
| 53 |                           |                                                                                                                                                                                                                                                                                                                                                      |     |
| 54 |                           |                                                                                                                                                                                                                                                                                                                                                      |     |
| 55 |                           |                                                                                                                                                                                                                                                                                                                                                      |     |
| 56 |                           |                                                                                                                                                                                                                                                                                                                                                      |     |
| 57 | Units of study            | <a href="#">#12</a>                                                                                                                                                                                                                                                                                                                                  | 5   |
| 58 |                           | Number and relevant characteristics of participants, documents, or events included in the study; level of                                                                                                                                                                                                                                            |     |
| 59 |                           |                                                                                                                                                                                                                                                                                                                                                      |     |
| 60 |                           |                                                                                                                                                                                                                                                                                                                                                      |     |

participation (could be reported in results)

|    |                              |                     |       |
|----|------------------------------|---------------------|-------|
| 1  |                              |                     |       |
| 2  |                              |                     |       |
| 3  | Data processing              | <a href="#">#13</a> | 5     |
| 4  |                              |                     |       |
| 5  |                              |                     |       |
| 6  |                              |                     |       |
| 7  |                              |                     |       |
| 8  |                              |                     |       |
| 9  | Data analysis                | <a href="#">#14</a> | 5     |
| 10 |                              |                     |       |
| 11 |                              |                     |       |
| 12 |                              |                     |       |
| 13 |                              |                     |       |
| 14 |                              |                     |       |
| 15 |                              |                     |       |
| 16 | Techniques to enhance        | <a href="#">#15</a> | 5     |
| 17 | trustworthiness              |                     |       |
| 18 |                              |                     |       |
| 19 |                              |                     |       |
| 20 |                              |                     |       |
| 21 | Syntheses and                | <a href="#">#16</a> | 6-10  |
| 22 | interpretation               |                     |       |
| 23 |                              |                     |       |
| 24 |                              |                     |       |
| 25 |                              |                     |       |
| 26 |                              |                     |       |
| 27 | Links to empirical data      | <a href="#">#17</a> | 6-10  |
| 28 |                              |                     |       |
| 29 |                              |                     |       |
| 30 |                              |                     |       |
| 31 | Intergration with prior      | <a href="#">#18</a> | 10-12 |
| 32 | work, implications,          |                     |       |
| 33 | transferability and          |                     |       |
| 34 | contribution(s) to the field |                     |       |
| 35 |                              |                     |       |
| 36 |                              |                     |       |
| 37 |                              |                     |       |
| 38 |                              |                     |       |
| 39 |                              |                     |       |
| 40 | Limitations                  | <a href="#">#19</a> | 11-12 |
| 41 |                              |                     |       |
| 42 |                              |                     |       |
| 43 | Conflicts of interest        | <a href="#">#20</a> | 11-12 |
| 44 |                              |                     |       |
| 45 |                              |                     |       |
| 46 |                              |                     |       |
| 47 |                              |                     |       |
| 48 | Funding                      | <a href="#">#21</a> | 3     |
| 49 |                              |                     |       |
| 50 |                              |                     |       |
| 51 |                              |                     |       |

The SRQR checklist is distributed with permission of Wolters Kluwer © 2014 by the Association of American Medical Colleges. This checklist can be completed online using <https://www.goodreports.org/>, a tool made by the [EQUATOR Network](#) in collaboration with [Penelope.ai](#)

# BMJ Open

## Qualitative perspectives on the sustainability of sexual health continuous quality improvement in clinics serving remote Aboriginal communities in Australia

|                                 |                                                                                                                                                                                                                                                                                                                                                                                                                                                                                                                                                                                                                                                                                                                                                                                                                                                                                                                           |
|---------------------------------|---------------------------------------------------------------------------------------------------------------------------------------------------------------------------------------------------------------------------------------------------------------------------------------------------------------------------------------------------------------------------------------------------------------------------------------------------------------------------------------------------------------------------------------------------------------------------------------------------------------------------------------------------------------------------------------------------------------------------------------------------------------------------------------------------------------------------------------------------------------------------------------------------------------------------|
| Journal:                        | <i>BMJ Open</i>                                                                                                                                                                                                                                                                                                                                                                                                                                                                                                                                                                                                                                                                                                                                                                                                                                                                                                           |
| Manuscript ID                   | bmjopen-2018-026679.R1                                                                                                                                                                                                                                                                                                                                                                                                                                                                                                                                                                                                                                                                                                                                                                                                                                                                                                    |
| Article Type:                   | Research                                                                                                                                                                                                                                                                                                                                                                                                                                                                                                                                                                                                                                                                                                                                                                                                                                                                                                                  |
| Date Submitted by the Author:   | 20-Feb-2019                                                                                                                                                                                                                                                                                                                                                                                                                                                                                                                                                                                                                                                                                                                                                                                                                                                                                                               |
| Complete List of Authors:       | Gunaratnam, Praveena; UNSW Sydney , Kirby Institute<br>Schierhout, Gill H.; UNSW Sydney, Kirby Institute<br>Brands, Jenny; Menzies School of Health Research<br>Maher, Lisa; UNSW Sydney, The Kirby Institute; Burnet Institute<br>Bailie, Ross; The University of Sydney, University Centre for Rural Health<br>Ward, James; South Australia Health and Medical Research Centre<br>Guy, Rebecca; UNSW Sydney, The Kirby Institute<br>Rumbold, Alice; University of Adelaide, Robinson Research Institute<br>Ryder, Nathan; University of Newcastle, School of Medicine and Public Health<br>Fairley, Christopher; Melbourne Sexual Health Centre; Monash University, Central Clinical School<br>Donovan, Basil; UNSW Sydney, The Kirby Institute<br>Moore, Liz; Aboriginal Medical Services Alliance Northern Territory<br>Kaldor, John; UNSW Sydney, The Kirby Institute<br>Bell, Stephen; UNSW Sydney, Kirby Institute |
| <b>Primary Subject Heading</b>: | Sexual health                                                                                                                                                                                                                                                                                                                                                                                                                                                                                                                                                                                                                                                                                                                                                                                                                                                                                                             |
| Secondary Subject Heading:      | Qualitative research, Health services research, Health policy, Infectious diseases                                                                                                                                                                                                                                                                                                                                                                                                                                                                                                                                                                                                                                                                                                                                                                                                                                        |
| Keywords:                       | Aboriginal, Australia, continuous quality improvement, primary health care, remote                                                                                                                                                                                                                                                                                                                                                                                                                                                                                                                                                                                                                                                                                                                                                                                                                                        |
|                                 |                                                                                                                                                                                                                                                                                                                                                                                                                                                                                                                                                                                                                                                                                                                                                                                                                                                                                                                           |

SCHOLARONE™  
Manuscripts

1  
2  
3 **Qualitative perspectives on the sustainability of sexual health continuous quality**  
4 **improvement in clinics serving remote Aboriginal communities in Australia**  
5

6 **Authors :** Praveena Gunaratnam, Kirby Institute, UNSW Sydney\*  
7 [praveenagunaratnam@gmail.com](mailto:praveenagunaratnam@gmail.com)  
8 Gill Schierhout, Kirby Institute, UNSW Sydney  
9 [gschierhout@kirby.unsw.edu.au](mailto:gschierhout@kirby.unsw.edu.au)  
10 Jenny Brands, Menzies School of Health Research  
11 [Jenny.Brands@menzies.edu.au](mailto:Jenny.Brands@menzies.edu.au)  
12 Lisa Maher, Kirby Institute, UNSW Sydney; Burnet Institute, Melbourne  
13 [lmaher@kirby.unsw.edu.au](mailto:lmaher@kirby.unsw.edu.au)  
14 Ross Bailie, University of Sydney, University Centre for Rural Health,  
15 Northern Rivers, NSW  
16 [ross.bailie@sydney.edu.au](mailto:ross.bailie@sydney.edu.au)  
17 James Ward, South Australia Health and Medical Research Institute  
18 [James.Ward@sahmri.com](mailto:James.Ward@sahmri.com)  
19 Rebecca Guy, Kirby Institute, UNSW Sydney  
20 [rguy@kirby.unsw.edu.au](mailto:rguy@kirby.unsw.edu.au)  
21 Alice Rumbold, Robinson Research Institute, University of Adelaide  
22 [alice.rumbold@adelaide.edu.au](mailto:alice.rumbold@adelaide.edu.au)  
23 Nathan Ryder, School of Medicine and Public Health, University of Newcastle  
24 [Nathan.ryder@hnehealth.nsw.gov.au](mailto:Nathan.ryder@hnehealth.nsw.gov.au);  
25 Christopher K Fairley, Melbourne Sexual Health Centre; Central Clinical  
26 School, Monash University  
27 [CFairley@mshc.org.au](mailto:CFairley@mshc.org.au)  
28 Basil Donovan, Kirby Institute, UNSW Sydney; Sydney Sexual Health Centre  
29 [bdonovan@kirby.unsw.edu.au](mailto:bdonovan@kirby.unsw.edu.au)  
30 Liz Moore, Aboriginal Medical Services Alliance Northern Territory  
31 [liz.moore@amsant.org.au](mailto:liz.moore@amsant.org.au)  
32 John Kaldor, Kirby Institute, UNSW Sydney  
33 [jkaldor@kirby.unsw.edu.au](mailto:jkaldor@kirby.unsw.edu.au)  
34 Stephen Bell, Kirby Institute, UNSW Sydney  
35 [sbell@kirby.unsw.edu.au](mailto:sbell@kirby.unsw.edu.au)  
36  
37  
38  
39  
40  
41

42 \*Corresponding author  
43

44 **Word Count:** 4320  
45

46 **Proposed Journal:** BMJ Open  
47  
48  
49  
50  
51  
52  
53  
54  
55  
56  
57  
58  
59  
60

**Abstract**

- Objectives:* To examine barriers and facilitators to sustaining a sexual health continuous quality improvement (CQI) program in clinics serving remote Aboriginal communities in Australia.
- Design:* Qualitative study.
- Setting:* Primary health care services serving remote Aboriginal communities in the Northern Territory, Australia.
- Participants:* Seven of the 11 regional sexual health coordinators responsible for supporting the Northern Territory Government Remote Sexual Health Program.
- Methods:* Semi-structured in-depth interviews conducted in person or by telephone; data were analysed using an inductive and deductive thematic approach.
- Results:* Despite uniform availability of CQI tools and activities, sexual health CQI implementation varied across the Northern Territory. Participant narratives identified five factors enhancing the uptake and sustainability of sexual health CQI. At clinic level, these included adaptation of existing CQI tools for use in specific clinic contexts and risk environments (e.g. a syphilis outbreak), local ownership of CQI processes, and management support for CQI. At a regional level, factors included the positive framing of CQI as a tool to identify and act on areas for improvement, and regional facilitation of clinic level CQI activities. Three barriers were identified, including the significant workload associated with acute and chronic care in Aboriginal primary care services, high staff turnover, and lack of Aboriginal staff. Considerations affecting the future sustainability of sexual health CQI included the need to reduce the burden on clinics from multiple CQI programs, the contribution of regional sexual health coordinators and support structures, and access to and use of high quality information systems.
- Conclusions:* This study contributes to the growing evidence on how CQI approaches may improve sexual health in remote Australian Aboriginal communities. Enhancing sustainability of sexual health CQI in this context will require ongoing regional facilitation, efforts to build local ownership of CQI processes, and management of competing demands on health service staff.
- Key words:** sexual health, Aboriginal, Australia, continuous quality improvement, primary health care, remote



## STRENGTHS AND LIMITATIONS OF THIS STUDY

- This is the first qualitative study to document clinic- and regional- level factors influencing uptake and sustainability of a sexual health continuous quality improvement (CQI) program in government-run primary care services serving remote Aboriginal communities in the Northern Territory (NT), Australia.
- Using in-depth interviews with 7 of the 11 sexual health coordinators employed to improve testing and treatment for sexually transmissible infections (STIs) in government-run primary care services elicited rich data about the challenges influencing sustained use of a sexual health CQI approach to improve STI testing and treatment rates.
- This is a qualitative study with a small, non-random sample size, and as such findings should not be viewed as generalizable to other settings.

## FUNDING STATEMENT

The STRIVEplus study is funded through a National Health and Medical Research Council Partnership Grant (APP1060471). The funder played no role in design or implementation of this study.

## COMPETING INTEREST STATEMENT

The authors have ongoing involvement in Aboriginal health, sexual health and CQI in Australia, as researchers, clinicians and policymakers.

## AUTHOR CONTRIBUTIONS

PG, GS, JB and SB designed the study. PG, JB and SB conducted data collection. PG, JB and SB undertook analysis of the data. PG, GS and SB led on drafting of the manuscript. All other authors (LM, RB, JW, RG, AR, NR, CKF, BD, LM, JK) assisted with interpretation of data and review of successive drafts of the manuscript. All authors read and approved the final manuscript.

## DATA SHARING STATEMENT

No additional data are available.

## INTRODUCTION

Residents in remote Aboriginal and Torres Strait Islander (hereafter referred to as 'Aboriginal') communities in Australia experience high rates of sexually transmissible infections (STIs), estimated in one large, multi-community study at 10%, 11% and 18% respectively for gonorrhoea, chlamydia and syphilis (1). Clinical guidelines for these communities recommend at least annual STI testing, timely treatment, partner notification and regular re-testing, particularly those under 35 years old (2, 3). However, recent estimates indicate that annual STI testing coverage in remote communities is still only 20%, with lower rates in men than in women (4).

Since the 1990s, continuous quality improvement (CQI) approaches – typically consisting of 'plan-do-study-act' cycles to monitor the functioning of organisational systems and identify and implement improvements (5) – have been used to improve health care quality and outcomes associated with, for example, chronic disease (6-10). In Australia, Aboriginal Community Controlled Health Services (ACCHS) and government-run health services providing primary health care to Aboriginal communities have used CQI extensively to make evidence-based improvements in clinical care (11-13).

Between 2011-2014, the STRIVE (STIs in Remote communities, ImproVed and Enhanced primary care) trial was conducted in 67 remote communities in the Northern Territory (NT), Queensland and Western Australia (14). STRIVE demonstrated that a clinic level sexual health CQI program supported by regional dedicated sexual health coordinators (14-16) could improve STI testing rates (15), with aspects of the CQI program becoming normalised in clinical practice (16). However, testing increases were from a low baseline and did not lead to lower STI prevalence over the time frame of the trial (15).

Elements of the STRIVE CQI approach were incorporated into the NT Government Remote Sexual Health Program (3). The program employs regionally-based sexual health coordinators to work with government-run primary care services to improve STI testing and treatment. Their roles include providing feedback on STI control through audits and review of clinical data; annual discussions with staff to assess and make recommendations for improving clinic-wide systems that support STI control (systems assessments); and sexual health education and staff training (3).

To gain insight into CQI practice for STI control in the NT since the STRIVE study finished in 2014, and to explore factors affecting the long-term sustainability of this approach in government-run health services, we conducted qualitative interviews with sexual health coordinators. Data were collected as part of a new study called STRIVEplus – a long-term observational study of sexual health CQI in the NT between 2015-2019.

## METHODS

This was a qualitative study using semi-structured, in-depth interviews. The design, data collection, analysis and reporting of this study were conducted in accordance with the Standards for Reporting Qualitative Research (SRQR) (17).

## Setting

The NT of Australia covers 1.4 million square kilometres, with an estimated resident population of 230,000, of whom 26% are Aboriginal (compared to 3% nationally) (18). Most (79%) Aboriginal residents in the NT live in remote areas (19), and are served by two types of primary care services – ACCHS or NT government health services. Remote clinics are primarily staffed by Aboriginal health workers or registered nurses (often on short-term fly in-fly out contracts) with support from resident or visiting general practitioners and other specialist or allied health providers (16).

The setting for this study was the NT government health service sector, specifically the NT Government Remote Sexual Health Program. This program coordinates support for sexual health service delivery across both the Top End Health Service (covering approximately 35% of the geographic area and 80% of the population) and Central Australia Health Service (65% of the geographic area and 20% of the population) (19).

## Study participants

All sexual health coordinators working in the NT Department of Health (n=11) in 2016 were approached up to three times and invited to participate in an in-depth qualitative interview. This resulted in seven sexual health coordinators providing informed consent to be interviewed between March 2016 and January 2017. Of the seven, three worked in Central Australia and four in the Top End; six were women; six had worked in their current role for more than one year, while one had started the role eight months prior to the interview but had previously worked in a specialist sexual health clinic for more than one year. Coordinators worked with between 4 to 11 services, and one also had a region-wide function. None were Aboriginal.

## Data Collection

A semi-structured qualitative interview guide was developed to explore participants' understandings of CQI for sexual health; the post-STRIVE trial transition; factors influencing the uptake and sustained application of CQI approaches; and perceptions of the impact of CQI on sexual health service provision. Interviews lasted between 25-80 minutes and were conducted by three interviewers (JB, PG, SB) in person (n=2) or by telephone (n=5).

## Patient and public involvement

Patients and the public were not involved in this study.

## Research team and reflexivity

Interviews were conducted by PG, JB and SB, who had no prior relationship with interviewees in this study. With extensive qualitative research experience, these researchers were able to build rapport and conduct semi-structured interviews with health professionals to elicit deep insight from research participants. The make-up of the research and authorship team also enhanced the credibility of the findings. For instance, all interviewers (PG, JB, SB) conducted rigorous qualitative analysis to ensure that agreement was sought on the main findings from the analysis. All other authors have career experience in research and clinical practice focussing on sexual health CQI in diverse Australian settings, which ensured

1  
2  
3 interpretation of data informed by current and historical sexual health CQI practice and  
4 policy in the Northern Territory.  
5

## 6 **Data analysis**

7  
8  
9 Interviews were audio-recorded and transcribed verbatim before uploading into QRS NVivo  
10 version 11 for analysis (QRS International Pty Ltd, Melbourne, Australia). A thematic  
11 analysis approach (20) was used by two team members (PG and JB). First, we familiarized  
12 ourselves with the data through reading and re-reading of transcripts, noting down initial  
13 thematic ideas and ‘theoretical memos’ (20) as analytical reminders for making links between  
14 different findings. Second, a codebook consisting of parent and child nodes was developed  
15 using inductive (codes from initial reads of the interview data) and deductive (codes from  
16 existing literature and the discussion guides) data categorization techniques. Third, all  
17 transcripts were coded systematically, whilst reviewing and editing the codebook according  
18 to the data.  
19  
20

## 21 **Ethics**

22  
23  
24 Approval was obtained from Central Australian Human Research Ethics Committee (HREC  
25 15-298) and the Human Research Ethics Committee of the NT Department of Health and the  
26 Menzies School of Health Research (HREC 2015-2374).  
27

## 28 **RESULTS**

### 29 **Understanding of sexual health CQI**

30  
31  
32  
33 Participants consistently described CQI for improved sexual health service delivery as an  
34 iterative, ongoing process used to assess current performance of a service, identify strengths  
35 and weaknesses, design strategies to improve performance, and review data to evaluate the  
36 impact of those strategies.  
37

38  
39 “You make a plan, you do the intervention, then you review what you’ve done, and  
40 then you act and improve the deficiencies, or you go with the strengths and try and  
41 address the weaknesses.” (SH3, Central Australia)  
42

43  
44 All participants felt that CQI activities could lead to a higher quality of sexual health care by  
45 helping staff to understand who is at risk and to identify gaps in service delivery. They also  
46 felt that the data collected for sexual health CQI could drive improvements by allowing  
47 services to see how they compare and to gauge their performance independent of targets.  
48

49  
50 “The clinics don’t know the other clinics on [the list]. They just see where they rank and  
51 it makes it pretty evident of how well they’re doing... and just focusing the discussion  
52 on missed opportunities.” (SH2, Central Australia)  
53

### 54 **Current sexual health CQI practice**

55  
56 Sexual health coordinators reported varying levels of sexual health CQI engagement and  
57 capability in the services they worked with. At one end of the spectrum were services which  
58 regularly reviewed data and deployed strategies to address gaps and improve key indicators,  
59  
60

1  
2  
3 such as STI testing. For these services, capability in sexual health CQI appeared to be part of  
4 a broader capability and interest in improving performance across different aspects of care:  
5

6 “[Certain services are] always working to their performance indicators... they’re always  
7 checking on the traffic light reports to see whether they’ve got their adult health checks  
8 done... we just recently realised there was a gap between the 15 to 24 year olds so  
9 we’ve gone through the communities and done some targeted screening.” (SHC7, Top  
10 End)  
11  
12

13 In contrast, other services were perceived as undertaking less sexual health CQI activity, or as  
14 requiring support from a sexual health coordinator to do so.  
15

16 “They need constant prompts, because what you find is if you go out there, their rates of  
17 testing have picked up. That’s what happens, when you go out and give them some  
18 education, their testing will pick up. You can’t take your eye off the ball.” (SHC5, Top  
19 End)  
20  
21

22 Higher levels of sexual health CQI capability were attributed to greater managerial support,  
23 and CQI data and activity being used to identify and act on areas for improvement.  
24

25 “The two [clinics] that I’m thinking of that do well is because their clinic manager is  
26 really onto it and made it a priority. They’ve been around for a while, those clinic  
27 managers.” (SH2, Central Australia)  
28  
29

### 30 *CQI activities, tools and related actions for STI control*

31

32 Incorporation of the STRIVE CQI approach into the sexual health coordinators’ roles included  
33 the use of specific tools – described in detail elsewhere (14, 16) – particularly in relation to  
34 increasing testing. In summary, these tools included audits, systems assessments, data review  
35 and action plans to identify specific activities to improve gaps in service delivery. In addition,  
36 ‘traffic light reports’ is a management tool used by the NT government which draws  
37 automated extraction of data from the Primary Care Information System (PCIS) used by  
38 government services to report quarterly on selected clinical performance indicators. One  
39 participant noted that visual data reports were particularly appreciated by clinic staff.  
40  
41

42 “I’ve done the stats, my system assessments tools ... that’s a very powerful tool  
43 because the clinic will sit back and go, ‘oh, wow’ ... They’ll look at the spider graphs  
44 and they really get into that visual stuff to find out their strengths and weaknesses and  
45 how they can improve.” (SH5, Top End)  
46  
47

48 Participants felt the CQI process should identify simple but reproducible actions to improve  
49 care. To increase testing and re-testing, some participants cited specific actions including  
50 integration of sexual health into routine adult health checks, the use of recalls and reminder  
51 cards, and prompts embedded in the electronic health information system.  
52  
53

54 “Now that sexual health is integrated into the adult health check, through the men’s and  
55 women’s checks, that has been the single most [important change]. Putting in recalls for  
56 sexual health in PCIS has actually improved it. Making sure that I’m auditing so that we  
57 know if somebody’s not being followed up. Then we ask the hard questions why and  
58 follow that through.” (SH7, Top End)  
59  
60

1  
2  
3  
4 “There’s things like putting recalls on for test for re-infection, using the STI template  
5 which is embedded in PCIS and things like that as a prompt to help better sexual health  
6 delivery.” (SH4, Top End)  
7

8  
9 One participant reported that services engaged in activities such as regular monitoring of  
10 individual migration within and between communities, in order to be more responsive to their  
11 clients’ needs for sexual health care. While this element of patient-centred care does not fit the  
12 definition of CQI, the co-ordinator considered this to be closely related to a CQI activity that  
13 helps to identify gaps in service delivery.  
14

15  
16 “[Service staff] know to keep an eye out for those people that have been out in the long  
17 grass [away from community for a period of time] and coming back to community.  
18 That’s that undercurrent of stuff that goes on that we talk about and make sure you’re  
19 checking, that sort of non-documented CQI that you do without doing CQI.” (SH7, Top  
20 End)  
21

22  
23 Some participants reported that tools such as the STRIVE systems assessment required  
24 adaptation for ongoing use. One co-ordinator noted the increased demand for this type of  
25 assessment across different aspects of care, and reluctance among clinic managers to allow  
26 staff to participate in what, during the STRIVE trial, were perceived to be lengthy assessment  
27 meetings.  
28

29  
30 “Now every program in the NT has a systems assessment attached to it. When we went  
31 to do it [systems assessment] last year my boss said to me ‘No, we’re not’, they kept  
32 cancelling it. And I said ‘Look, why don’t we do it, why don’t you allow us to have  
33 half an hour?’ And they said ‘Yeah, alright, we can let you have half an hour’. And in  
34 that time we did the system assessment. It was quick and really targeted.” (SH7, Top  
35 End)  
36

## 37 **Current challenges to implementation of CQI for sexual health**

### 38 ***Prioritisation of sexual health CQI***

39  
40 The significant workload associated with acute and chronic conditions in the patient  
41 population (5, 21, 22) meant primary care staff were not able to prioritise sexual health. This  
42 impacted both on sexual health activities within daily clinic practice, and on the time  
43 available for CQI during sexual health coordinator visits.  
44  
45  
46

47  
48 “Clinics are bombarded by everything. ...STIs, I mean it’s mostly asymptomatic,  
49 probably not going to cause too much trouble... it’s not a huge priority in engagement  
50 in Indigenous people.” (SH2, Central Australia)  
51

52  
53 “When I’m out in the community I’ll give a talk, depending on how much time I have.  
54 Sometimes I’m really pressured for time, they’ll only allocate me so much time  
55 depending what’s going on in the community or in the clinic.” (SH5, Top End)  
56

57  
58 Some participants reported the substantial work in surveillance and response as a result of an  
59 outbreak of infectious syphilis, ongoing since 2013 in remote communities in the Northern  
60



1  
2  
3 Territory (23). However, one participant felt the outbreak increased the perceived importance  
4 of sexual health and the use of CQI to drive STI testing and follow up.  
5

6  
7 “We have ... reports where we can pull out who in the community hasn’t had an STI  
8 check in the last 12 months, and who hasn’t had a syphilis check. Those have been  
9 extremely valuable... It gives [clinic managers] a focus, like it gives them people that  
10 they can actually go and [test], rather than saying, ‘Look, you’ve only tested 40% of  
11 your people’” (SH2, Central Australia)  
12

### 13 ***Lack of staff and staff turnover***

14  
15  
16 Staff shortages and high staff turnover were mentioned by most participants as presenting a  
17 significant challenge to ongoing quality sexual health CQI.  
18

19  
20 “I will go [to a clinic] and do the action plan, and then I’ll go back the next time and  
21 there’ll be new staff, and they won’t know what you’re talking about.” (SH5, Top End)  
22

23 One participant reported that the lack of Aboriginal health staff increasingly affects the  
24 ability to provide high quality, culturally appropriate health services. It was perceived as  
25 important to recruit, train and support younger Aboriginal community members to work in  
26 health services, particularly as community members who have been performing these  
27 functions retire.  
28

29  
30 “You’re finding less and less Indigenous staff in the health centres. Less [Aboriginal]  
31 health practitioners. New [non-Aboriginal] staff, even if they’re good and conscientious  
32 and want to do everything right, still have difficulty with communication, going to  
33 different areas. They don’t know the people. Some of them aren’t there long enough to  
34 build up that rapport with people and get their trust.” (SH6 Top End)  
35

### 36 **Future considerations in sexual health CQI**

#### 37 ***Local ownership of CQI processes***

38  
39  
40 Some participants believed that, while coordinators facilitated the process, sexual health CQI  
41 processes should ultimately be owned by staff and managers at primary care services; and  
42 could be used to advocate for additional resources to improve sexual health service delivery.  
43  
44

45  
46 “[Our role is] a facilitation role. You’re allowing that information and asking the right  
47 questions to draw out more answers, being a bit directive but allowing the clinicians to  
48 come up with it themselves so they have ownership of it.” (SH4, Top End)  
49

50  
51 “If sexual health isn’t a priority because they’ve only had one staff and they’re doing  
52 emergencies all day, they can turn around to management and say, ‘Yeah, sure, give me  
53 more bloody staff’, and it’s a tool for them too.” (SH3, Central Australia)  
54

55 The level of facilitation required from sexual health coordinators to sustain sexual health CQI  
56 was perceived by some participants as dependent on the clinic and clinic manager.  
57  
58  
59  
60



1  
2  
3 “For some communities [clinics] I don’t think they need it [facilitation and support to  
4 conduct CQI] as much as others, and again, I think that’s really dependent on the actual  
5 community [clinic] and on the clinic manager.” (SH2, Central Australia)  
6  
7

### 8 ***Competing CQI demands***

9  
10 Participants discussed the tension between maintaining sexual health-specific CQI efforts or  
11 integrating them into broader CQI practices (13, 24).  
12

13  
14 “Everyone works and audits and does their quality improvement in such silos that there  
15 really seems to be no integration of services talking to each other.” (SH2, Central  
16 Australia)  
17

18 Some participants reported that separating sexual health CQI from broader CQI efforts  
19 creates confusion and increases the burden on services involved in multiple systems and  
20 processes. However, most participants also felt that sexual health-specific CQI, integrated  
21 within existing primary care systems and processes, was critical to ensure sexual health is  
22 addressed. Without specific processes, sexual health could easily be overlooked due to other  
23 service priorities, and because of patient and health worker discomfort.  
24

25  
26 “I do think having a dedicated sexual health team looking at CQI does bring it into  
27 focus and I think certainly does engage practitioners to reflect on, you know, how well  
28 they do incorporate sexual health practices into their everyday practice.” (SH1, Central  
29 Australia)  
30

31  
32 “...it’s like a big shame job for everyone. Like clinicians are uncomfortable to do it,  
33 patients are uncomfortable, so I think it needs to be highlighted.” (SH4, Top End)  
34

### 35 ***Information systems and CQI***

36  
37 Understanding and communicating service activity data was perceived by participants as  
38 central to motivating action to improve service delivery. The current patient information  
39 management system used by government health services in the NT was perceived to have  
40 improved, particularly with respect to automated reporting. However, some participants  
41 suggested that the system could be simpler and more responsive to changes in clinical  
42 guidelines.  
43  
44

45  
46 “I mean health nowadays is so changeable, you know we’re coming up with different  
47 testing abilities, different... I think you have to have an information system that can  
48 keep up, be flexible and that can change. PCIS was a bit difficult at times to navigate  
49 around and get things changed.” (SH1, Central Australia)  
50

51  
52 One participant stressed that information management systems should not just produce  
53 aggregated reports but also have capacity to be used to support clinicians in individual patient  
54 management, by allowing clinic staff to identify which patients were not being followed up  
55 for treatment or recalled for re-testing, for example.  
56

57  
58 “You can turn around and you can say, ‘Right, well this is the reason that we’re not  
59 performing because half the people aren’t actually living in the community’... we  
60 should be able to get a list of the patients easily and be able to go out to the clinics and

1  
2  
3 give them information, and if need be, do the targeted quality audits that can actually  
4 drill in and make clear changes.” (SH3, Central Australia)  
5

## 6 **DISCUSSION**

7  
8  
9 Our study contributes to existing research on sexual health and CQI in remote Australian  
10 settings (11, 16, 21, 25, 26) by identifying factors at clinic and Territory levels that both  
11 improve and impede the uptake and sustainability of sexual health CQI practices.  
12

13 At the clinic level, an important factor perceived as enhancing the uptake and sustainability  
14 of sexual health CQI was the adaptation of STRIVE CQI tools and reports for use in specific  
15 clinic contexts, and for responding to a risk environment such as the syphilis outbreak. The  
16 need for adaptation of CQI activities to ensure they are continually fit for purpose has been  
17 documented elsewhere (7, 27). This study also identified activities that are not traditionally  
18 defined as clinical CQI, such as monitoring movement between and within communities, but  
19 which assisted service practitioners with monitoring progress and implementing new  
20 strategies to improve sexual health outcomes.  
21  
22

23 Two other clinic-level factors that support the implementation and sustainability of sexual  
24 health CQI included local ownership of, and management support for, these processes.  
25 However, these were enabled by two regional level factors. The first was regional facilitation  
26 of ongoing clinic-level sexual health CQI by sexual health coordinators which helped to raise  
27 the profile of sexual health within services, including with managers. Previous research has  
28 illustrated the pivotal role of a regional sexual health coordinator function in effective STI  
29 interventions in remote Aboriginal communities (16, 28). The second was the positive  
30 framing of CQI as a tool to identify and act on areas for improvement. At the Territory level,  
31 ongoing general CQI implementation in the NT is attributed to high levels of policy support  
32 compared to other states in Australia (27).  
33  
34  
35

36 Our study also identified factors that impede the implementation and sustainability of sexual  
37 health CQI. As identified in other Australian studies (5, 16, 21, 22), participants described  
38 how the significant demands of acute and chronic care on Aboriginal primary care services  
39 render sexual health CQI a relatively low priority. As has occurred with chronic disease (29),  
40 targets could be used to encourage a greater focus on sexual health. Exploring team structures  
41 and workflow strategies which allow sufficient focus on preventive care (30) to reduce the  
42 likelihood of sexual health being continually overshadowed by more immediate priorities has  
43 also been suggested as a strategy to deal with this challenge (31).  
44  
45  
46

47 Workforce shortages and high staff turnover were also described as limiting ongoing staff  
48 participation in sexual health CQI activities, which in turn inhibits the sustainability of sexual  
49 health CQI at a regional level. The lack of experienced Aboriginal health staff was  
50 highlighted as particularly problematic, due to the strength of community relationships and  
51 trust that Aboriginal health workers and practitioners can build (22, 31). These issues have  
52 been documented elsewhere as barriers to the provision of quality care in services that  
53 provide health care to Aboriginal populations (16, 21, 25, 31), and may be particularly  
54 important in delivery of quality sexual health care. Strategies to address barriers to Aboriginal  
55 workforce participation have the potential to have positive effects on sexual health CQI in  
56 these communities and should be supported.  
57  
58  
59  
60

1  
2  
3 Finally, our findings point to three considerations affecting the future sustainability of sexual  
4 health CQI. First, while coordinators explained that sexual health-specific CQI ensured a  
5 focus on this difficult health area (5, 21, 22), they acknowledged the need to reduce the  
6 burden on clinics from multiple CQI programs. Ongoing monitoring of recently available  
7 Territory-wide sexual health indicators will help understand if this type of measure is  
8 sufficient to increase the perceived importance of sexual health and STI control within  
9 primary health care clinics. However, there is also a need to identify which specific CQI tools  
10 and activities could be incorporated into generic CQI processes to ensure that sexual health is  
11 not overlooked.  
12  
13

14  
15 Second, findings stress the important contribution of regional sexual health coordinators and  
16 support structures to ongoing service improvements and CQI participation in the NT,  
17 particularly in the context of high staff turnover. Re-assessment of how support for sexual  
18 health CQI is funded and managed may be indicated, and whether this is incorporated within  
19 infectious disease surveillance and response, as is largely the case now, or more broadly as  
20 part of primary care service development.  
21  
22

23 Third, access to, and use of, high quality information systems and data was seen as a major  
24 strength of sexual health CQI, which in turn increases the sustained use of sexual health CQI  
25 into the future. The use of benchmarking to motivate action and improvement by allowing  
26 services to compare themselves to others is similar to findings from other research (6, 11, 16,  
27 31, 32). The current information system used by government clinics was perceived to be  
28 largely supportive of CQI efforts, including the regular review of data, though simplification  
29 and ongoing flexibility were recommended. This points to the need for an evolving and  
30 responsive health information system.  
31  
32

### 33 **Study limitations**

34  
35 There are several limitations to this study. First, this is a qualitative study with a small, non-  
36 random sample size, and as such findings should not be viewed as generalisable to all remote  
37 settings. Despite the small sample size, ‘external validity’ (33) – the degree to which findings  
38 can be generalized across diverse settings within the Northern Territory – was enhanced by  
39 interviewing the majority (7 of 11) of employees responsible for supporting sexual health  
40 CQI within government-led primary health care services in this region. It was also enhanced  
41 through data interpretation processes that involved researchers and clinicians with ongoing  
42 involvement and interest in CQI, who were able to reflect critically on the findings in the  
43 context of current and historical sexual health CQI practice and policy in the Northern  
44 Territory and other settings in Australia.  
45  
46  
47

48 Second, the data collection strategies – involving three interviewers, and conducting  
49 interviews both in person and by telephone – may have increased the variation among  
50 individual responses. However, ‘internal reliability’ (33) was enhanced by interviewers  
51 working together to ensure rigour and consistency in data analysis and agreement about the  
52 presentation of research findings. Third, given the focus on government-run services, findings  
53 may not be generalisable to ACCHS. As part of STRIVEplus, further qualitative research  
54 focused on Territory-level key informants and health service staff, across both the  
55 government and the community-controlled sectors, will address these gaps.  
56  
57  
58  
59  
60

## CONCLUSION

CQI is only one of several strategies needed to reduce high STI incidence and prevalence among Aboriginal Australians in remote communities. To ensure sustainability at the service and state level, sexual health CQI activities require responsive and efficient information systems, and, in the context of high staff turnover, a regional coordination function. Strategies to address barriers to the uptake and sustainability of sexual health CQI must be developed and evaluated, to reduce the high burden of disease associated with STIs in this population.

## REFERENCES

1. Silver BJ, Guy RJ, Wand H, Ward J, Rumbold AR, Fairley CK, et al. Incidence of curable sexually transmissible infections among adolescents and young adults in remote Australian Aboriginal communities: analysis of longitudinal clinical service data. *Sexually transmitted infections*. 2015;91(2):135-41.
2. Central Australian Rural Practitioners Association. CARPA Standard Treatment Manual, 7th edn. Alice Springs: Central Australian Rural Practitioners Association Inc. 2017 [Available from: <https://www.remotephmanuals.com.au/home.html> validated 29 January 2018].
3. Centre for Disease Control DoH, Northern Territory, . NT Guidelines for the Management of Sexually Transmitted Infections in the Primary Health Care Setting, 4th Edn.: Department of Health; 2016 [Available from: <http://digitallibrary.health.nt.gov.au/prodjspui/handle/10137/699> validated 29 January 2018].
4. Hengel B, Wand H, Ward J, Rumbold A, Garton L, Taylor-Thomson D, et al. Patient, staffing and health centre factors associated with annual testing for sexually transmissible infections in remote primary health centres. *Sex Health*. 2017;14(3):274-81.
5. Bailie RS, Si D, O'Donoghue L, Dowden M. Indigenous health: effective and sustainable health services through continuous quality improvement. *The Medical journal of Australia*. 2007;186(10):525-7.
6. Ferlie EB, Shortell SM. Improving the Quality of Health Care in the United Kingdom and the United States: A Framework for Change. *Milbank Q*. 2001;79(2):281-315.
7. Lau R, Stevenson F, Ong BN, Dziedzic K, Treweek S, Eldridge S, et al. Achieving change in primary care—causes of the evidence to practice gap: systematic reviews of reviews. *Implement Sci*. 2016;11(1):40.
8. Grol R, Grimshaw J. From best evidence to best practice: effective implementation of change in patients' care. *The Lancet*. 2007;362(9391):1225-30.
9. McElwaine KM, Freund M, Campbell EM, Bartlem KM, Wye PM, Wiggers JH. Systematic review of interventions to increase the delivery of preventive care by primary care nurses and allied health clinicians. *Implement Sci*. 2016;11(1):50.
10. Tricco AC, Ivers NM, Grimshaw JM, Moher D, Turner L, Galipeau J, et al. Effectiveness of quality improvement strategies on the management of diabetes: a systematic review and meta-analysis. *Lancet*. 2012;379(9833):2252-61.
11. Gardner KL, Dowden M, Togni S, Bailie R. Understanding uptake of continuous quality improvement in Indigenous primary health care: lessons from a multi-site case study of the Audit and Best Practice for Chronic Disease project. *Implementation science : IS*. 2010;5.
12. Gibson-Helm ME, Teede HJ, Rumbold AR, Ranasinha S, Bailie RS, Boyle JA. Continuous quality improvement and metabolic screening during pregnancy at primary health centres attended by Aboriginal and Torres Strait Islander women. *The Medical journal of Australia*. 2015;203(9):369-70.

13. Allen and Clarke. Evaluation of the Northern Territory Continuous Quality Improvement (CQI) Investment Strategy: Summary report. Department of Health, Canberra.; 2016.
14. Ward J, McGregor S, Guy RJ, Rumbold AR, Garton L, Silver BJ, et al. STI in remote communities: improved and enhanced primary health care (STRIVE) study protocol: a cluster randomised controlled trial comparing 'usual practice' STI care to enhanced care in remote primary health care services in Australia. *BMC Infect Dis*. 2013;13:425.
15. Ward J, Guy RJ, Rumbold AR, McGregor S, Wand H, McManus H, et al. A pragmatic stepped wedge cluster randomised trial of continuous quality improvement strategies to improve the control of sexually transmissible infections in remote Australian Aboriginal communities. forthcoming.
16. Hengel B, Bell S, Garton L, Ward J, Rumbold A, Taylor-Thomson D, et al. Perspectives of primary health care staff on the implementation of a sexual health quality improvement program: a qualitative study in remote aboriginal communities in Australia. *BMC Health Serv Res*. 2018;18(1):230.
17. O'Brien BC, Harris IB, Beckman TJ, Reed DA, Cook DA. Standards for reporting qualitative research: a synthesis of recommendations. *Academic medicine : journal of the Association of American Medical Colleges*. 2014;89(9):1245-51.
18. Australian Bureau of Statistics. 2016 Census QuickStats - Northern Territory 2016 [Available from: [http://quickstats.censusdata.abs.gov.au/census\\_services/getproduct/census/2016/quickstat/7?opendocument](http://quickstats.censusdata.abs.gov.au/census_services/getproduct/census/2016/quickstat/7?opendocument) validated 9 August 2018].
19. Northern Territory Department of Health. 2016-17 Annual Report: NT Health; 2017 [Available from: Available online at: <http://digitallibrary.health.nt.gov.au/prodjspui/handle/10137/1417> (verified 29 January 2018).
20. Strauss A, Corbin J. Basics of qualitative research. Thousand Oaks: Sage; 1990.
21. Hengel B, Maher L, Garton L, Ward J, Rumbold A, Taylor-Thomson D, et al. Reasons for delays in treatment of bacterial sexually transmissible infections in remote Aboriginal communities in Australia: a qualitative study of healthcentre staff. *Sex Health*. 2015;12(4):341-7.
22. Newham J, Schierhout G, Bailie R, Ward PR. 'There's only one enabler; come up, help us': staff perspectives of barriers and enablers to continuous quality improvement in Aboriginal primary health-care settings in South Australia. *Aust J Prim Health*. 2016;22(3):244-54.
23. Bright A, Dups J. Infectious and congenital syphilis notifications associated with an ongoing outbreak in northern Australia. *Commun Dis Intell Q Rep*. 2016;40(1):E7-10.
24. The Lowitja Institute. Recommendations for a National CQI Framework for Aboriginal and Torres Strait Islander Primary Health Care, 2014 [Available from: Available online at: <http://www.health.gov.au/internet/main/publishing.nsf/content/cqi-framework-atsih> (verified 29 January 2018).
25. Schierhout G, Hains J, Si D, Kennedy C, Cox R, Kwedza R, et al. Evaluating the effectiveness of a multifaceted, multilevel continuous quality improvement program in primary health care: developing a realist theory of change. *Implement Sci*. 2013;8(1):119.
26. Gardner K, Bailie R, Si D, O'Donoghue L, Kennedy C, Liddle H, et al. Reorienting primary health care for addressing chronic conditions in remote Australia and the South Pacific: review of evidence and lessons from an innovative quality improvement process. *The Australian journal of rural health*. 2011;19(3):111-7.
27. Woods C, Carlisle K, Larkins S, Thompson SC, Tsey K, Matthews V, et al. Exploring Systems That Support Good Clinical Care in Indigenous Primary Health-care Services: A Retrospective Analysis of Longitudinal Systems Assessment Tool Data from High-Improving Services. *Front Public Health*. 2017;5(45).



- 1  
2  
3 28. Guy R, Ward JS, Smith KS, Su J-Y, Huang R-L, Tangey A, et al. The impact of sexually  
4 transmissible infection programs in remote Aboriginal communities in Australia: a systematic  
5 review. *Sexual health*. 2012;9(3):205-12.  
6  
7 29. Bailie J, Schierhout GH, Kelaher MA, Laycock AF, Percival NA, O'Donoghue LR, et  
8 al. Follow-up of Indigenous-specific health assessments - a socioecological analysis. *Med J*  
9 *Aust*. 2014;200(11):653-7.  
10 30. Nattabi B, Girgis S, Matthews V, Bailie R, Ward JE. Clinic predictors of better syphilis  
11 testing in Aboriginal primary healthcare: a promising opportunity for primary healthcare  
12 service managers. *Aust J Prim Health*. 2018.  
13 31. Bailie J, Matthews V, Laycock A, Schultz R, Burgess CP, Peiris D, et al. Improving  
14 preventive health care in Aboriginal and Torres Strait Islander primary care settings. *Global*  
15 *Health*. 2017;13(1):48.  
16 32. Larkins S, Woods CE, Matthews V, Thompson SC, Schierhout G, Mitropoulos M, et  
17 al. Responses of Aboriginal and Torres Strait Islander Primary Health-Care Services to  
18 Continuous Quality Improvement Initiatives. *Front Public Health*. 2015;3:288.  
19 33. Bryman A. *Social Research Methods*. 5th edition ed. Oxford: Oxford University Press;  
20 2016.  
21  
22  
23  
24  
25  
26  
27  
28  
29  
30  
31  
32  
33  
34  
35  
36  
37  
38  
39  
40  
41  
42  
43  
44  
45  
46  
47  
48  
49  
50  
51  
52  
53  
54  
55  
56  
57  
58  
59  
60



# Reporting checklist for qualitative study.

Based on the SRQR guidelines.

## Instructions to authors

Complete this checklist by entering the page numbers from your manuscript where readers will find each of the items listed below.

Your article may not currently address all the items on the checklist. Please modify your text to include the missing information. If you are certain that an item does not apply, please write "n/a" and provide a short explanation.

Upload your completed checklist as an extra file when you submit to a journal.

In your methods section, say that you used the SRQR reporting guidelines, and cite them as:

O'Brien BC, Harris IB, Beckman TJ, Reed DA, Cook DA. Standards for reporting qualitative research: a synthesis of recommendations. *Acad Med.* 2014;89(9):1245-1251.

|                                            | Reporting Item                                                                                                                                                                                                                                                                             | Page Number |
|--------------------------------------------|--------------------------------------------------------------------------------------------------------------------------------------------------------------------------------------------------------------------------------------------------------------------------------------------|-------------|
|                                            | <a href="#">#1</a> Concise description of the nature and topic of the study identifying the study as qualitative or indicating the approach (e.g. ethnography, grounded theory) or data collection methods (e.g. interview, focus group) is recommended                                    | 2           |
|                                            | <a href="#">#2</a> Summary of the key elements of the study using the abstract format of the intended publication; typically includes background, purpose, methods, results and conclusions                                                                                                | 2           |
| Problem formulation                        | <a href="#">#3</a> Description and significance of the problem / phenomenon studied: review of relevant theory and empirical work; problem statement                                                                                                                                       | 4           |
| Purpose or research question               | <a href="#">#4</a> Purpose of the study and specific objectives or questions                                                                                                                                                                                                               | 4           |
| Qualitative approach and research paradigm | <a href="#">#5</a> Qualitative approach (e.g. ethnography, grounded theory, case study, phenomenology, narrative research) and guiding theory if appropriate; identifying the research paradigm (e.g. postpositivist, constructivist / interpretivist) is also recommended; rationale. The | 4/5         |

rationale should briefly discuss the justification for choosing that theory, approach, method or technique rather than other options available; the assumptions and limitations implicit in those choices and how those choices influence study conclusions and transferability. As appropriate the rationale for several items might be discussed together.

|    |                            |                                                                                                                                                                                                                                                                                                                                                      |     |
|----|----------------------------|------------------------------------------------------------------------------------------------------------------------------------------------------------------------------------------------------------------------------------------------------------------------------------------------------------------------------------------------------|-----|
| 1  |                            |                                                                                                                                                                                                                                                                                                                                                      |     |
| 2  |                            |                                                                                                                                                                                                                                                                                                                                                      |     |
| 3  |                            |                                                                                                                                                                                                                                                                                                                                                      |     |
| 4  |                            |                                                                                                                                                                                                                                                                                                                                                      |     |
| 5  |                            |                                                                                                                                                                                                                                                                                                                                                      |     |
| 6  |                            |                                                                                                                                                                                                                                                                                                                                                      |     |
| 7  |                            |                                                                                                                                                                                                                                                                                                                                                      |     |
| 8  |                            |                                                                                                                                                                                                                                                                                                                                                      |     |
| 9  |                            |                                                                                                                                                                                                                                                                                                                                                      |     |
| 10 | Researcher characteristics | <a href="#">#6</a>                                                                                                                                                                                                                                                                                                                                   | 5   |
| 11 | and reflexivity            | Researchers' characteristics that may influence the research, including personal attributes, qualifications / experience, relationship with participants, assumptions and / or presuppositions; potential or actual interaction between researchers' characteristics and the research questions, approach, methods, results and / or transferability |     |
| 12 |                            |                                                                                                                                                                                                                                                                                                                                                      |     |
| 13 |                            |                                                                                                                                                                                                                                                                                                                                                      |     |
| 14 |                            |                                                                                                                                                                                                                                                                                                                                                      |     |
| 15 |                            |                                                                                                                                                                                                                                                                                                                                                      |     |
| 16 |                            |                                                                                                                                                                                                                                                                                                                                                      |     |
| 17 |                            |                                                                                                                                                                                                                                                                                                                                                      |     |
| 18 |                            |                                                                                                                                                                                                                                                                                                                                                      |     |
| 19 |                            |                                                                                                                                                                                                                                                                                                                                                      |     |
| 20 | Context                    | <a href="#">#7</a>                                                                                                                                                                                                                                                                                                                                   | 4-5 |
| 21 |                            | Setting / site and salient contextual factors; rationale                                                                                                                                                                                                                                                                                             |     |
| 22 | Sampling strategy          | <a href="#">#8</a>                                                                                                                                                                                                                                                                                                                                   | 5   |
| 23 |                            | How and why research participants, documents, or events were selected; criteria for deciding when no further sampling was necessary (e.g. sampling saturation); rationale                                                                                                                                                                            |     |
| 24 |                            |                                                                                                                                                                                                                                                                                                                                                      |     |
| 25 |                            |                                                                                                                                                                                                                                                                                                                                                      |     |
| 26 |                            |                                                                                                                                                                                                                                                                                                                                                      |     |
| 27 | Ethical issues pertaining  | <a href="#">#9</a>                                                                                                                                                                                                                                                                                                                                   | 6   |
| 28 | to human subjects          | Documentation of approval by an appropriate ethics review board and participant consent, or explanation for lack thereof; other confidentiality and data security issues                                                                                                                                                                             |     |
| 29 |                            |                                                                                                                                                                                                                                                                                                                                                      |     |
| 30 |                            |                                                                                                                                                                                                                                                                                                                                                      |     |
| 31 |                            |                                                                                                                                                                                                                                                                                                                                                      |     |
| 32 |                            |                                                                                                                                                                                                                                                                                                                                                      |     |
| 33 | Data collection methods    | <a href="#">#10</a>                                                                                                                                                                                                                                                                                                                                  | 5   |
| 34 |                            | Types of data collected; details of data collection procedures including (as appropriate) start and stop dates of data collection and analysis, iterative process, triangulation of sources / methods, and modification of procedures in response to evolving study findings; rationale                                                              |     |
| 35 |                            |                                                                                                                                                                                                                                                                                                                                                      |     |
| 36 |                            |                                                                                                                                                                                                                                                                                                                                                      |     |
| 37 |                            |                                                                                                                                                                                                                                                                                                                                                      |     |
| 38 |                            |                                                                                                                                                                                                                                                                                                                                                      |     |
| 39 |                            |                                                                                                                                                                                                                                                                                                                                                      |     |
| 40 |                            |                                                                                                                                                                                                                                                                                                                                                      |     |
| 41 | Data collection            | <a href="#">#11</a>                                                                                                                                                                                                                                                                                                                                  | 5   |
| 42 | instruments and            | Description of instruments (e.g. interview guides, questionnaires) and devices (e.g. audio recorders) used for data collection; if / how the instruments(s) changed over the course of the study                                                                                                                                                     |     |
| 43 | technologies               |                                                                                                                                                                                                                                                                                                                                                      |     |
| 44 |                            |                                                                                                                                                                                                                                                                                                                                                      |     |
| 45 |                            |                                                                                                                                                                                                                                                                                                                                                      |     |
| 46 | Units of study             | <a href="#">#12</a>                                                                                                                                                                                                                                                                                                                                  | 5   |
| 47 |                            | Number and relevant characteristics of participants, documents, or events included in the study; level of participation (could be reported in results)                                                                                                                                                                                               |     |
| 48 |                            |                                                                                                                                                                                                                                                                                                                                                      |     |
| 49 |                            |                                                                                                                                                                                                                                                                                                                                                      |     |
| 50 |                            |                                                                                                                                                                                                                                                                                                                                                      |     |
| 51 |                            |                                                                                                                                                                                                                                                                                                                                                      |     |
| 52 | Data processing            | <a href="#">#13</a>                                                                                                                                                                                                                                                                                                                                  | 5   |
| 53 |                            | Methods for processing data prior to and during analysis, including transcription, data entry, data management and security, verification of data integrity, data coding, and anonymisation / deidentification of excerpts                                                                                                                           |     |
| 54 |                            |                                                                                                                                                                                                                                                                                                                                                      |     |
| 55 |                            |                                                                                                                                                                                                                                                                                                                                                      |     |
| 56 |                            |                                                                                                                                                                                                                                                                                                                                                      |     |
| 57 |                            |                                                                                                                                                                                                                                                                                                                                                      |     |
| 58 |                            |                                                                                                                                                                                                                                                                                                                                                      |     |
| 59 | Data analysis              | <a href="#">#14</a>                                                                                                                                                                                                                                                                                                                                  | 5/6 |
| 60 |                            | Process by which inferences, themes, etc. were identified and                                                                                                                                                                                                                                                                                        |     |

|    |                                                                                              |                                                                                                                                                                                                                                                                                                                              |         |
|----|----------------------------------------------------------------------------------------------|------------------------------------------------------------------------------------------------------------------------------------------------------------------------------------------------------------------------------------------------------------------------------------------------------------------------------|---------|
|    |                                                                                              | developed, including the researchers involved in data analysis; usually references a specific paradigm or approach; rationale                                                                                                                                                                                                |         |
| 1  |                                                                                              |                                                                                                                                                                                                                                                                                                                              |         |
| 2  |                                                                                              |                                                                                                                                                                                                                                                                                                                              |         |
| 3  |                                                                                              |                                                                                                                                                                                                                                                                                                                              |         |
| 4  | Techniques to enhance trustworthiness                                                        | <a href="#">#15</a> Techniques to enhance trustworthiness and credibility of data analysis (e.g. member checking, audit trail, triangulation); rationale                                                                                                                                                                     | 12      |
| 5  |                                                                                              |                                                                                                                                                                                                                                                                                                                              |         |
| 6  |                                                                                              |                                                                                                                                                                                                                                                                                                                              |         |
| 7  |                                                                                              |                                                                                                                                                                                                                                                                                                                              |         |
| 8  |                                                                                              |                                                                                                                                                                                                                                                                                                                              |         |
| 9  | Syntheses and interpretation                                                                 | <a href="#">#16</a> Main findings (e.g. interpretations, inferences, and themes); might include development of a theory or model, or integration with prior research or theory                                                                                                                                               | 6-11    |
| 10 |                                                                                              |                                                                                                                                                                                                                                                                                                                              |         |
| 11 |                                                                                              |                                                                                                                                                                                                                                                                                                                              |         |
| 12 |                                                                                              |                                                                                                                                                                                                                                                                                                                              |         |
| 13 |                                                                                              |                                                                                                                                                                                                                                                                                                                              |         |
| 14 | Links to empirical data                                                                      | <a href="#">#17</a> Evidence (e.g. quotes, field notes, text excerpts, photographs) to substantiate analytic findings                                                                                                                                                                                                        | 6-10    |
| 15 |                                                                                              |                                                                                                                                                                                                                                                                                                                              |         |
| 16 |                                                                                              |                                                                                                                                                                                                                                                                                                                              |         |
| 17 |                                                                                              |                                                                                                                                                                                                                                                                                                                              |         |
| 18 | Intergration with prior work, implications, transferability and contribution(s) to the field | <a href="#">#18</a> Short summary of main findings; explanation of how findings and conclusions connect to, support, elaborate on, or challenge conclusions of earlier scholarship; discussion of scope of application / generalizability; identification of unique contributions(s) to scholarship in a discipline or field | 10-12   |
| 19 |                                                                                              |                                                                                                                                                                                                                                                                                                                              |         |
| 20 |                                                                                              |                                                                                                                                                                                                                                                                                                                              |         |
| 21 |                                                                                              |                                                                                                                                                                                                                                                                                                                              |         |
| 22 |                                                                                              |                                                                                                                                                                                                                                                                                                                              |         |
| 23 |                                                                                              |                                                                                                                                                                                                                                                                                                                              |         |
| 24 |                                                                                              |                                                                                                                                                                                                                                                                                                                              |         |
| 25 |                                                                                              |                                                                                                                                                                                                                                                                                                                              |         |
| 26 | Limitations                                                                                  | <a href="#">#19</a> Trustworthiness and limitations of findings                                                                                                                                                                                                                                                              | 12      |
| 27 |                                                                                              |                                                                                                                                                                                                                                                                                                                              |         |
| 28 |                                                                                              |                                                                                                                                                                                                                                                                                                                              |         |
| 29 | Conflicts of interest                                                                        | <a href="#">#20</a> Potential sources of influence of perceived influence on study conduct and conclusions; how these were managed                                                                                                                                                                                           | 3, 5,12 |
| 30 |                                                                                              |                                                                                                                                                                                                                                                                                                                              |         |
| 31 |                                                                                              |                                                                                                                                                                                                                                                                                                                              |         |
| 32 |                                                                                              |                                                                                                                                                                                                                                                                                                                              |         |
| 33 | Funding                                                                                      | <a href="#">#21</a> Sources of funding and other support; role of funders in data collection, interpretation and reporting                                                                                                                                                                                                   | 3       |
| 34 |                                                                                              |                                                                                                                                                                                                                                                                                                                              |         |
| 35 |                                                                                              |                                                                                                                                                                                                                                                                                                                              |         |

The SRQR checklist is distributed with permission of Wolters Kluwer © 2014 by the Association of American Medical Colleges. This checklist can be completed online using <https://www.goodreports.org/>, a tool made by the [EQUATOR Network](#) in collaboration with [Penelope.ai](#)
